# Supplementary material
Source: PubMed Central journal article supplement (PMC4059252)
Supplement: jm500389b_si_001.pdf [file jm500389b_si_001.pdf]

## Supporting Information For

### An Alternative Chelator for $^{89}\text{Zr}$ Radiopharmaceuticals: Radiolabeling and Evaluation of 3,4,3-(LI-1,2-HOPO)

Melissa A. Deri,<sup>†,‡,§</sup> Shashikanth Ponnala,<sup>†,‡</sup> Brian M. Zeglis,<sup>†</sup> Gabor Pohl,<sup>||</sup> J. J.

Dannenberg,<sup>\* ||</sup> Jason S. Lewis,<sup>\*,†</sup> and Lynn C. Francesconi<sup>\*,‡,§</sup>

<sup>†</sup> *Department of Radiology and the Program in Molecular Pharmacology and Chemistry, Memorial Sloan-Kettering Cancer Center, 1275 York Avenue, New York, NY 10065, USA.* <sup>‡</sup> *Department of Chemistry, Hunter College of the City University of New York, 695 Park Avenue, New York, NY 10065, USA.* <sup>§</sup> *Department of Chemistry, The Graduate Center of the City University of New York, 365 Fifth Avenue, New York, NY 10016, USA.* <sup>||</sup> *Department of Chemistry, City University of New York - Hunter College and the Graduate School, New York, NY, USA*

\*Email: Joseph Dannenberg, [jdannenberg@gc.cuny.edu](mailto:jdannenberg@gc.cuny.edu) (Hunter College); Jason S. Lewis, [lewisj2@mskcc.org](mailto:lewisj2@mskcc.org) (MSKCC); Lynn C. Francesconi, [lfrances@hunter.cuny.edu](mailto:lfrances@hunter.cuny.edu) (Hunter College)

## Supporting Information Contents

|                                                                            | Pages   |
|----------------------------------------------------------------------------|---------|
| HOPO synthetic scheme and experimental details ( <b>Scheme S1</b> )        | S3-4    |
| HOPO MS report ( <b>Figure S1</b> )                                        | S5      |
| HOPO HPLC chromatogram ( <b>Figure S2</b> )                                | S6      |
| HOPO/Zr-HOPO HPLC chromatogram ( <b>Figure S3</b> )                        | S7      |
| Zr-HOPO HRMS report ( <b>Figure S4</b> )                                   | S8      |
| NMR comparison of the HOPO ligand the Zr-HOPO complex ( <b>Figure S5</b> ) | S9      |
| Experimental Zr-HOPO IR spectra ( <b>Figure S6</b> )                       | S10     |
| Computed Zr-HOPO IR spectra ( <b>Figure S7</b> )                           | S11     |
| Zr-HOPO UV-Vis spectroscopy ( <b>Figures S8-9</b> )                        | S12-S13 |
| Complete Gaussian 09 reference (Ref. 48)                                   | S14     |
| DFT basis set evaluation ( <b>Table S1</b> )                               | S15     |
| DFT structure of Zr(1,2-HOPO) <sub>4</sub> ( <b>Figure S10</b> )           | S16     |
| DFT structure of DFOH <sub>2</sub> ( <b>Figure S11</b> )                   | S17     |
| Cartesian coordinates of all optimized structures (gas phase)              | S18-S35 |
| Cartesian coordinates of all optimized structures (CPCM,water)             | S36-S51 |
| Serum stability study SEC chromatograms ( <b>Figure S12</b> )              | S52     |
| Maximum intensity projection PET images ( <b>Figure S13</b> )              | S53     |
| Full biodistribution data ( <b>Tables S2-3</b> )                           | S54-S55 |
| Graphical biodistribution data ( <b>Figure S14-15</b> )                    | S56-S57 |
| Calculated P values ( <b>Table S4</b> )                                    | S58     |

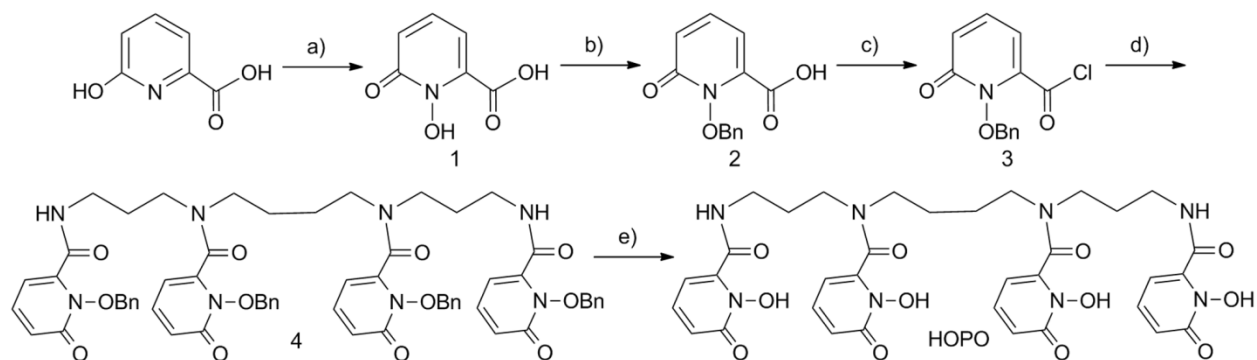

Scheme 1. Synthesis of 3,4,3-(LI-1,2-HOPO) (HOPO).

Reagents and conditions: a)  $\text{CH}_3\text{COOOH}$  (1.2 equiv), AcOH, TFA, 1 h, 79%; b)  $\text{BnCl}$  (1.2 equiv),  $\text{K}_2\text{CO}_3$  (2.0 equiv),  $\text{CH}_3\text{OH}$ , 16 h, 63 °C, 92%; c)  $(\text{COCl})_2$  (2.2 equiv),  $\text{CH}_2\text{Cl}_2$ , 0-25 °C, 6 h; d) spermine (0.17 equiv), TEA (2.0 equiv),  $\text{CH}_2\text{Cl}_2$ , 0-25 °C, 24 h, 81% over steps c & d; e) AcOH, HCl (12 N), 18 h, 45 °C, 42%

**6-Carboxy-1-hydroxy-2(1H)-pyridinone [1,2-HOPO carboxylic acid] (1).** The synthetic protocol from Xu et al. was employed with slight modifications.<sup>43</sup> 6-Hydroxypicolinic acid (10.0 g, 71.9 mmol) and peracetic acid (21.0 g, 88.4 mmol) were added to a stirring solution of glacial acetic acid (40.0 mL) and trifluoroacetic acid (60.0 mL). This mixture was stirred under nitrogen for 1 h at room temperature before being heated to 80 °C for 12 h. The reaction mixture started off a red-brown color and turned orange over time. A light color precipitate formed, was collected by filtration, and washed with cold methanol. After drying, the product was obtained as a beige solid (yield 79%).

**1-Benzyloxy-6-carboxy-2(1H)-pyridinone [1,2-HOPOBn carboxylic acid] (2).** Compound 1 (3.70 g, 23.8 mmol) and potassium carbonate (6.60 g, 47.7 mmol) were added to a stirring solution of benzyl chloride (3.60 g, 28.6 mmol) in methanol (10.0 mL). The mixture was heated to 63 °C and left to reflux for 16 h. The reaction mixture was a dark green suspension and formed a precipitate over time. The blue-gray solid was filtered out of the reaction mixture and the filtrate was collected. The solvent was evaporated and its residue was redissolved in 12.0 mL water. The solution was acidified to pH 2 by dropwise addition of 12 N HCl. An off-white precipitate was formed and was isolated by filtration. The product was washed with cold water and dried to yield a light beige solid (yield 92%).

**1-Benzyloxy-2(1H)-pyridinone-6-carbonyl chloride [1,2-HOPOBn acid chloride] (3).** A suspension of 2 (1.03 g, 4.20 mmol) in anhydrous dichloromethane (25 mL) was cooled to 0 °C. Excess oxalyl chloride (0.715 mL, 9.40 mmol) was added while stirring followed by catalytic amount of DMF (0.1 mL). Gas bubbles evolved, and the suspension became clear. The mixture was then left at room temperature for 6 h, and the solvent was removed by rotary evaporation to leave pale brown oil. After the oil was co-evaporated twice with toluene (10 mL), the crude acid chloride (3) was used directly for the next reaction without any purification.

**3,4,3-(LI-1,2-HOPO)Bn [benzyl-protected HOPO] (4).** A solution of crude **3** (0.79 g, 3.0 mmol) in dichloromethane (15 mL) was added drop wise to a stirred solution of triethylamine (0.84 mL, 6.0 mmol), spermine (0.10 g, 0.50 mmol) and DMAP (0.0060 g, 0.050 mmol) in dry dichloromethane (10 mL) at 0 °C. The reaction mixture was warmed to room temperature and stirring was continued for 24 h. The reaction mixture was washed with 10% NaHCO<sub>3</sub> solution, followed by water. The organic phase was dried over anhydrous Na<sub>2</sub>SO<sub>4</sub>, filtered, and concentrated to dryness. Purification by column chromatography (SiO<sub>2</sub>, 2-6% MeOH in CH<sub>2</sub>Cl<sub>2</sub>) afforded the benzyl-protected precursor 3,4,3-LI(1,2-HOPOBn) (**4**) as white foam (yield 81%).

**3,4,3-(LI-1,2-HOPO) (HOPO).** Compound **4** (0.20 g, 0.18 mmol) was dissolved in 1:1 mixture of acetic acid and concentrated HCl (15 mL) at room temperature and the reaction mixture was stirred at 50 °C for 18 h. The reaction progress was monitored by TLC. The crude product was dried, redissolved in water, and purified by HPLC on a semi-preparative C4 column (Jupiter 250 × 10 mm, 5 μM, Phenomenox) using a gradient of 5-28% MeCN in water (both containing 0.1% TFA) over 20 min. The product peak was collected from 7-8.92 min and the eluted solution was lyophilized to recover the product as a white solid. The purified ligand was collected in multiple small batches with an approximate combined yield of 42%.

Info for pane 1: MD-12-19-HOPO C34H38N8O12 750 (MD-12-19-HOPO C34H38N8O12 750.2608896 HF MeC  
Period 1, Expt. 1; Mass range: 100.0 to 1050.0 by 0.1 amu; Dwell: 0.3 ms; Pause: 255.0 ms  
Acq. Time: Wed, Dec 19, 2012 at 2:15:28 PM; Exp. Comment: Full Scan

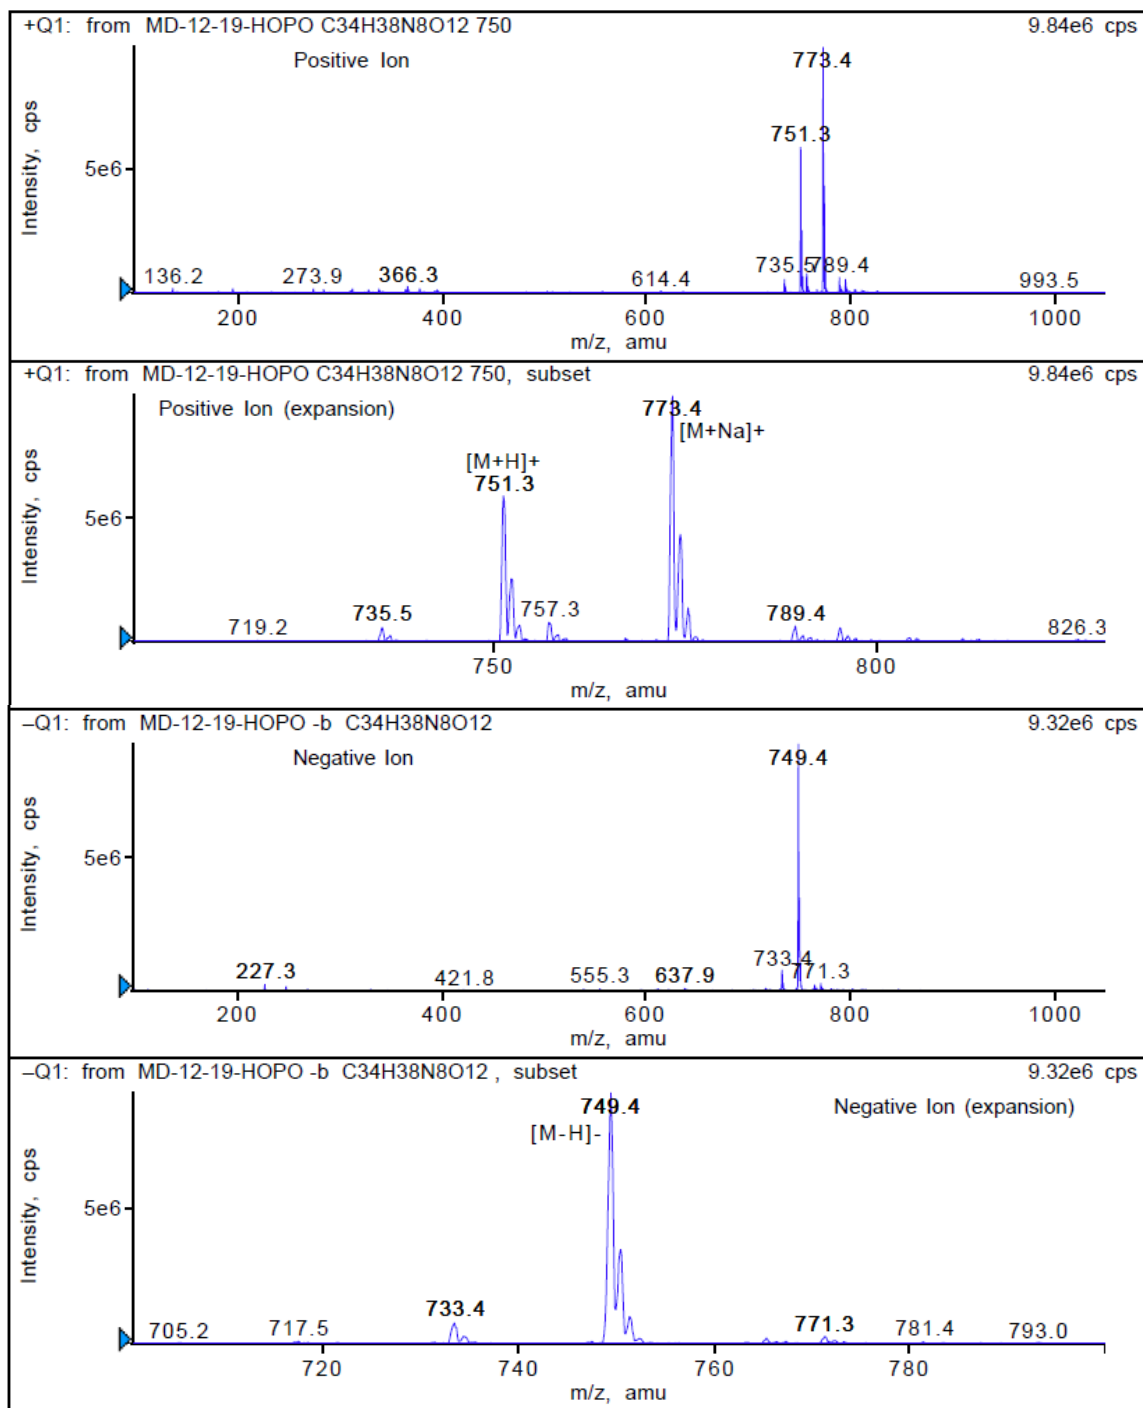

Figure S1. Mass spectrometry analysis of the HOPO ligand showing the expected mass signals.

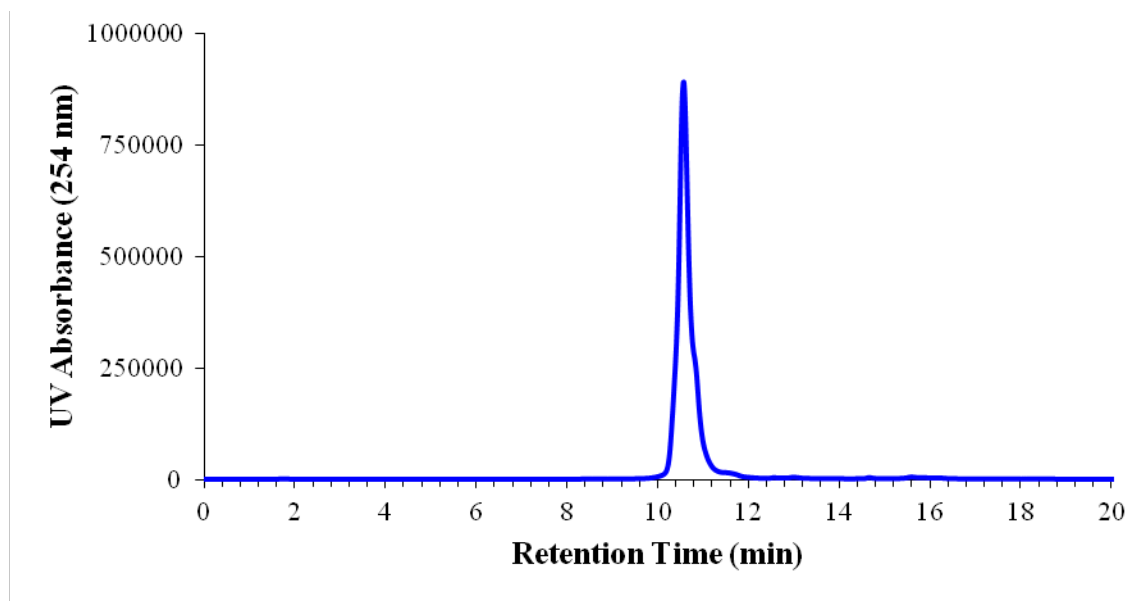

Figure S2. HPLC chromatogram of the HOPO ligand.

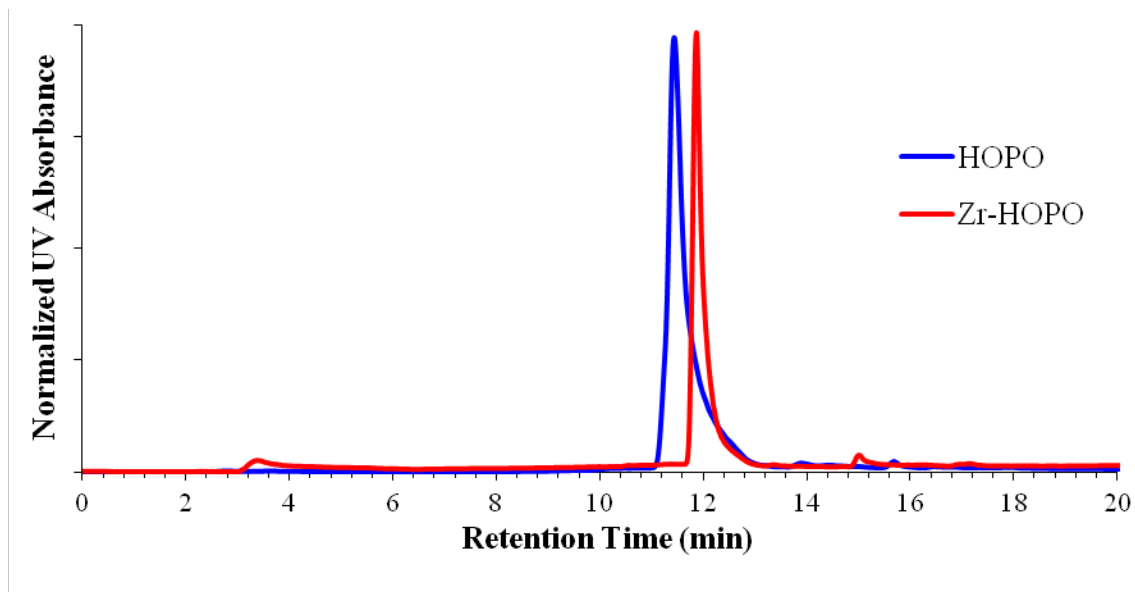

Figure S3. HPLC chromatogram of the HOPO ligand and the non-radioactive Zr-HOPO complex.

### Single Mass Analysis

Tolerance = 5.0 PPM / DBE: min = -1.5, max = 110.0

Element prediction: Off

Number of isotope peaks used for i-FIT = 4

Monoisotopic Mass, Even Electron Ions

225 formula(e) evaluated with 1 results within limits (up to 20 closest results for each mass)

Elements Used:

C: 0-34 H: 0-34 N: 0-8 O: 0-12 Na: 1-1 Zr: 0-1

C<sub>34</sub>H<sub>34</sub>N<sub>8</sub>O<sub>12</sub>Zr

MD-11-5-Zr-HOPO-HRMS 6 (0.145) Cm (5:9)

1: TOF MS ES+  
2.27e+003

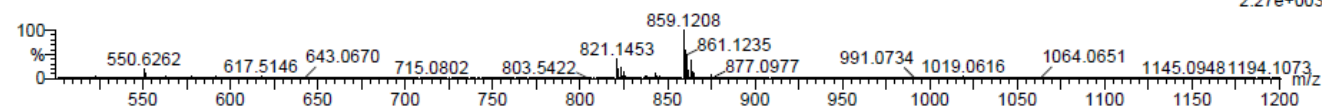

Minimum: -1.5  
Maximum: 5.0 5.0 110.0

| Mass     | Calc. Mass | mDa  | PPM  | DBE  | i-FIT | Formula                                                              |
|----------|------------|------|------|------|-------|----------------------------------------------------------------------|
| 859.1208 | 859.1241   | -3.3 | -3.8 | 22.5 | 5.7   | C <sub>34</sub> H <sub>34</sub> N <sub>8</sub> O <sub>12</sub> Na Zr |

Figure S4. High resolution mass spectrometry (HRMS) analysis of the Zr-HOPO complex showing the expected mass signal.



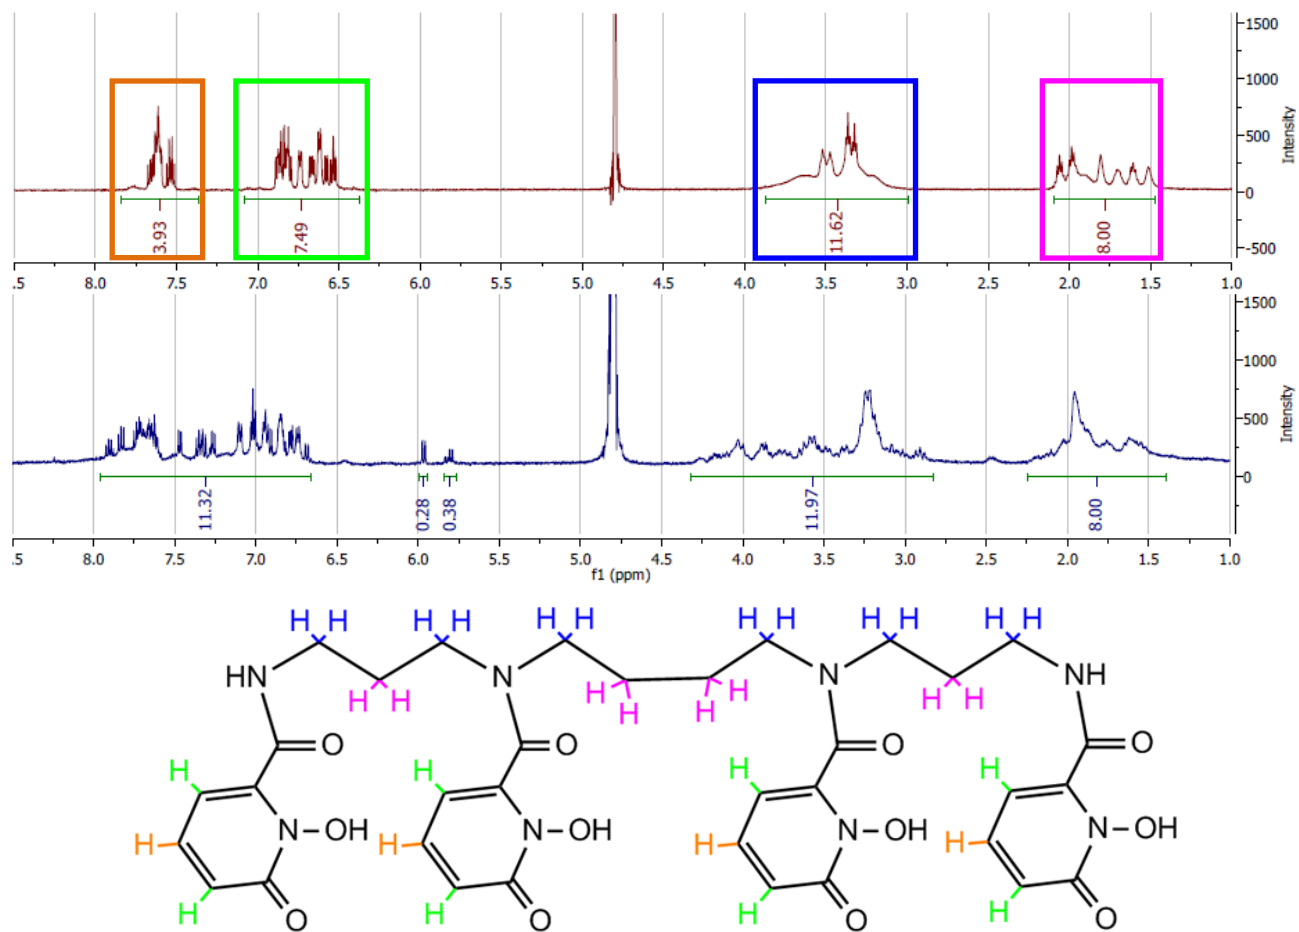

Figure S5.  $^1\text{H}$  NMR comparison of the HOPO ligand (top) and the Zr-HOPO complex (bottom). Spectra were collected on a 500 MHz machine in  $\text{D}_2\text{O}$ .

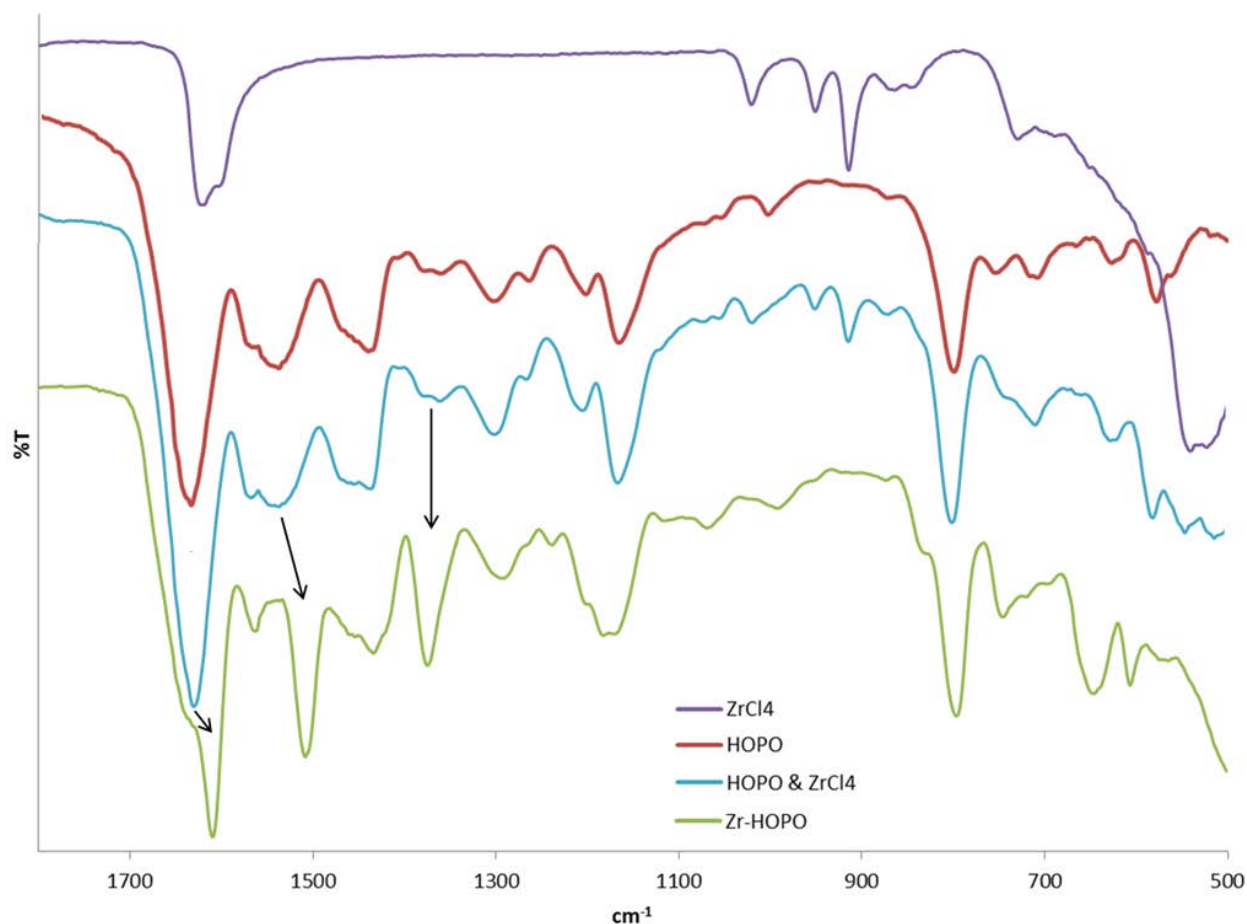

Figure S6. Experimental Zr-HOPO IR spectra. The purple line is powdered  $\text{ZrCl}_4$ . The red line is solid HOPO. The blue line is a mixture of solid HOPO and  $\text{ZrCl}_4$  powder while the green line is the lyophilized product of the complexation of HOPO and  $\text{ZrCl}_4$ . The three peaks pointed out in the figure correspond to changes in the spectra as a result of the complexation (from 1630 to 1610, 1564 to 1537, and 1375 to 1360  $\text{cm}^{-1}$ ). This red-shift is characteristic of a hydroxamate, or in this case a hydroxypyridinone, binding a metal. Furthermore, similar signals are seen in the DFT calculated IR spectra associated with a number of highly coupled asymmetric carbonyl stretches (see **Figure S7**).

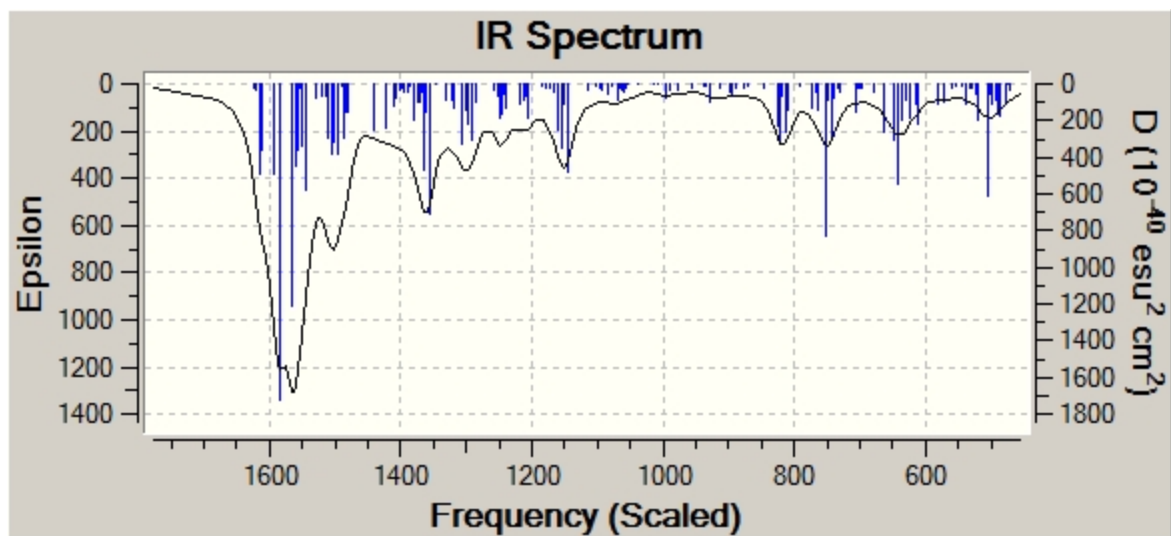

Figure S7. Computed Zr-HOPO IR spectrum. The spectrum is scaled by 0.992 and with a resolution of  $15 \text{ cm}^{-1}$ . The prominent peaks resembling those in the experimental (between  $1600$  and  $1300 \text{ cm}^{-1}$ ) correspond to various highly coupled asymmetric carbonyl stretches.

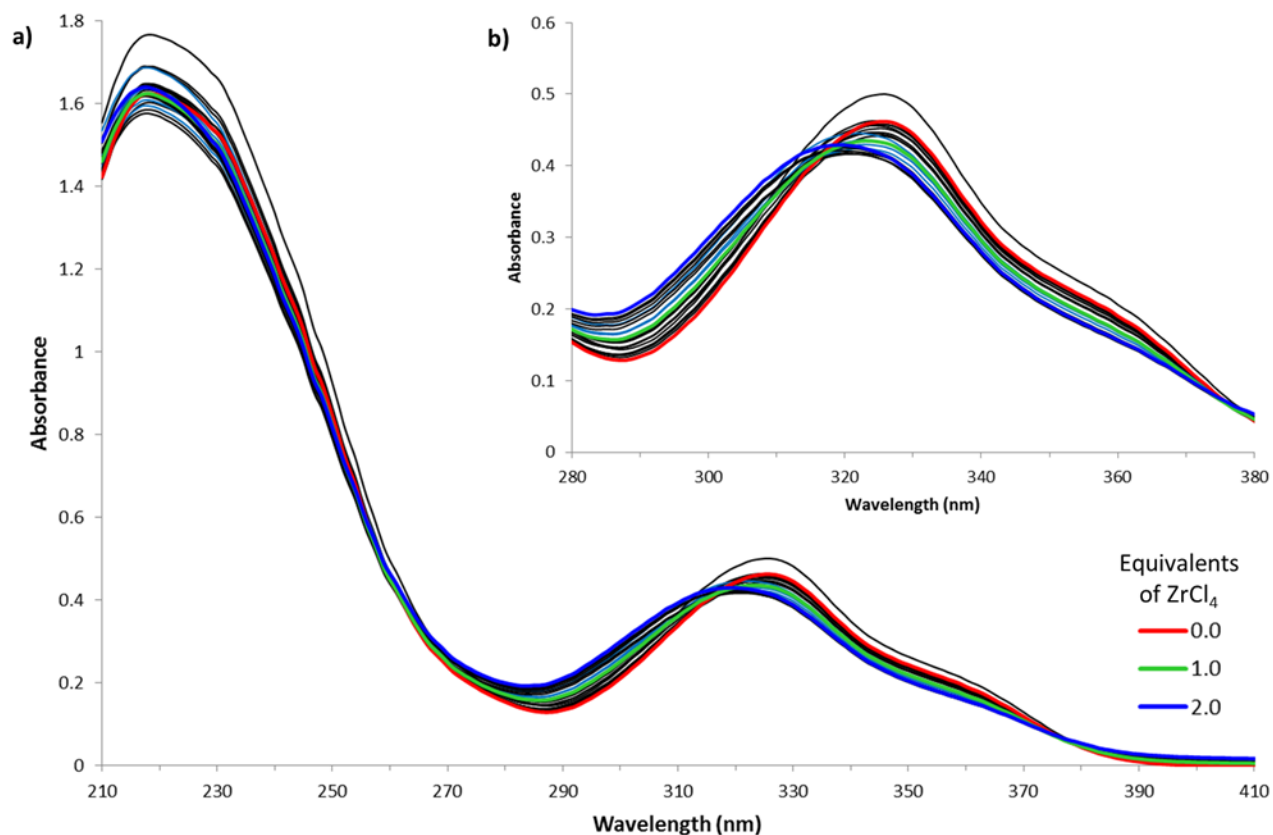

Figure S8. Zr-HOPO UV-Vis spectroscopy. Solutions of HOPO were prepared with 0.1 equivalent increments of  $ZrCl_4$  from 0.0 to 2.0 equivalents in PBS at a pH of 7.4 and allowed to equilibrate at room temperature for 24 h. The figure above shows a) the full spectrum and b) a zoomed in section highlighting the peak which undergoes the greatest change. While the peak does shift slightly lower in absorbance and to slightly lower wavelengths, neither of these changes shows a consistent stopping point corresponding to a specific ratio of Zr:HOPO.

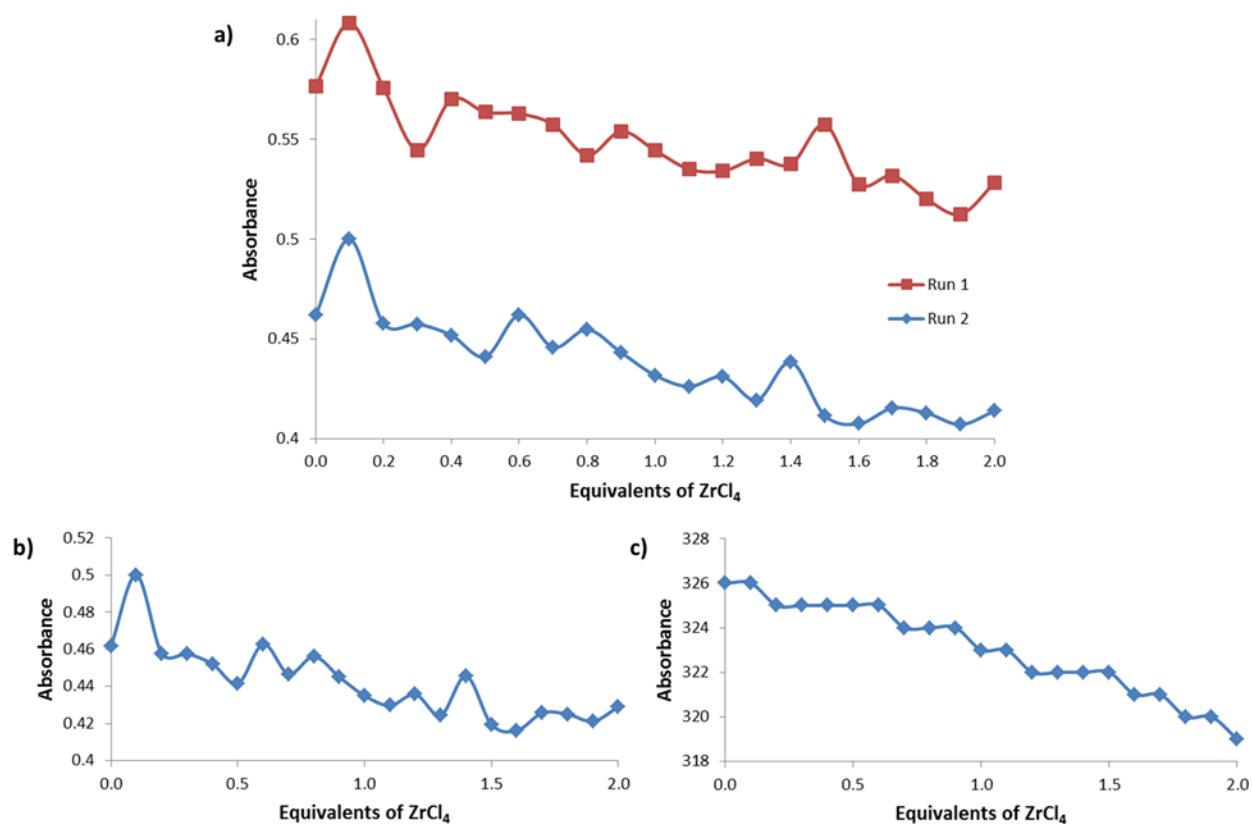

Figure S9. Zr-HOPO UV-Vis spectroscopy. The figure above shows a) a profile of the absorbance at 326 nm, b) a profile of the maximum peak absorbance, and c) a profile of the peak wavelength all according to the amount of  $ZrCl_4$ . None of these graphs demonstrate a distinct end point to the spectral changes. All of the shifts are small and continual over the entire range from 0.0 to 2.0 equivalents of  $ZrCl_4$ . There is no notable plateau at the 1:1 stoichiometry suggested by other experiments. These results are neither negative nor positive; they simply do not confer any information.

Complete reference for GAUSSIAN 09 (Ref. 48)

Gaussian 09, Revision A.02,

M. J. Frisch, G. W. Trucks, H. B. Schlegel, G. E. Scuseria, M. A. Robb, J. R. Cheeseman, G. Scalmani, V. Barone, B. Mennucci, G. A. Petersson, H. Nakatsuji, M. Caricato, X. Li, H. P. Hratchian, A. F. Izmaylov, J. Bloino, G. Zheng, J. L. Sonnenberg, M. Hada, M. Ehara, K. Toyota, R. Fukuda, J. Hasegawa, M. Ishida, T. Nakajima, Y. Honda, O. Kitao, H. Nakai, T. Vreven, J. A. Montgomery, Jr., J. E. Peralta, F. Ogliaro, M. Bearpark, J. J. Heyd, E. Brothers, K. N. Kudin, V. N. Staroverov, R. Kobayashi, J. Normand, K. Raghavachari, A. Rendell, J. C. Burant, S. S. Iyengar, J. Tomasi, M. Cossi, N. Rega, J. M. Millam, M. Klene, J. E. Knox, J. B. Cross, V. Bakken, C. Adamo, J. Jaramillo, R. Gomperts, R. E. Stratmann, O. Yazyev, A. J. Austin, R. Cammi, C. Pomelli, J. W. Ochterski, R. L. Martin, K. Morokuma, V. G. Zakrzewski, G. A. Voth, P. Salvador, J. J. Dannenberg, S. Dapprich, A. D. Daniels, O. Farkas, J. B. Foresman, J. V. Ortiz, J. Cioslowski, and D. J. Fox, Gaussian, Inc., Wallingford CT, 2009.

Gaussian 09, Revision C.01,

M. J. Frisch, G. W. Trucks, H. B. Schlegel, G. E. Scuseria, M. A. Robb, J. R. Cheeseman, G. Scalmani, V. Barone, B. Mennucci, G. A. Petersson, H. Nakatsuji, M. Caricato, X. Li, H. P. Hratchian, A. F. Izmaylov, J. Bloino, G. Zheng, J. L. Sonnenberg, M. Hada, M. Ehara, K. Toyota, R. Fukuda, J. Hasegawa, M. Ishida, T. Nakajima, Y. Honda, O. Kitao, H. Nakai, T. Vreven, J. A. Montgomery, Jr., J. E. Peralta, F. Ogliaro, M. Bearpark, J. J. Heyd, E. Brothers, K. N. Kudin, V. N. Staroverov, T. Keith, R. Kobayashi, J. Normand, K. Raghavachari, A. Rendell, J. C. Burant, S. S. Iyengar, J. Tomasi, M. Cossi, N. Rega, J. M. Millam, M. Klene, J. E. Knox, J. B. Cross, V. Bakken, C. Adamo, J. Jaramillo, R. Gomperts, R. E. Stratmann, O. Yazyev, A. J. Austin, R. Cammi, C. Pomelli, J. W. Ochterski, R. L. Martin, K. Morokuma, V. G. Zakrzewski, G. A. Voth, P. Salvador, J. J. Dannenberg, S. Dapprich, A. D. Daniels, O. Farkas, J. B. Foresman, J. V. Ortiz, J. Cioslowski, and D. J. Fox, Gaussian, Inc., Wallingford CT, 2010.

| Basis set   | MeOH to MeO <sup>-</sup> | EtOH to EtO <sup>-</sup> |
|-------------|--------------------------|--------------------------|
| cep-121g    | 381.5                    | 377.5                    |
| cep-31g     | 387.6                    | 384.7                    |
| LANL2DZ     | 389.9                    | 385.5                    |
| QZVP        | 380.0                    | 376.7                    |
| cc-pVTZ     | 385.6                    | 381.6                    |
| aug-cc-pVTZ | 377.6                    | 374.7                    |
| cc-pVQZ     | 382.1                    | 378.2                    |
| aug-cc-pVQZ | 377.7                    | 374.9                    |
| expt.       | 381.6 ± 0.7              | 378.6 ± 0.8              |

Table S1. Deprotonation enthalpies obtained with B3LYP using different basis sets.

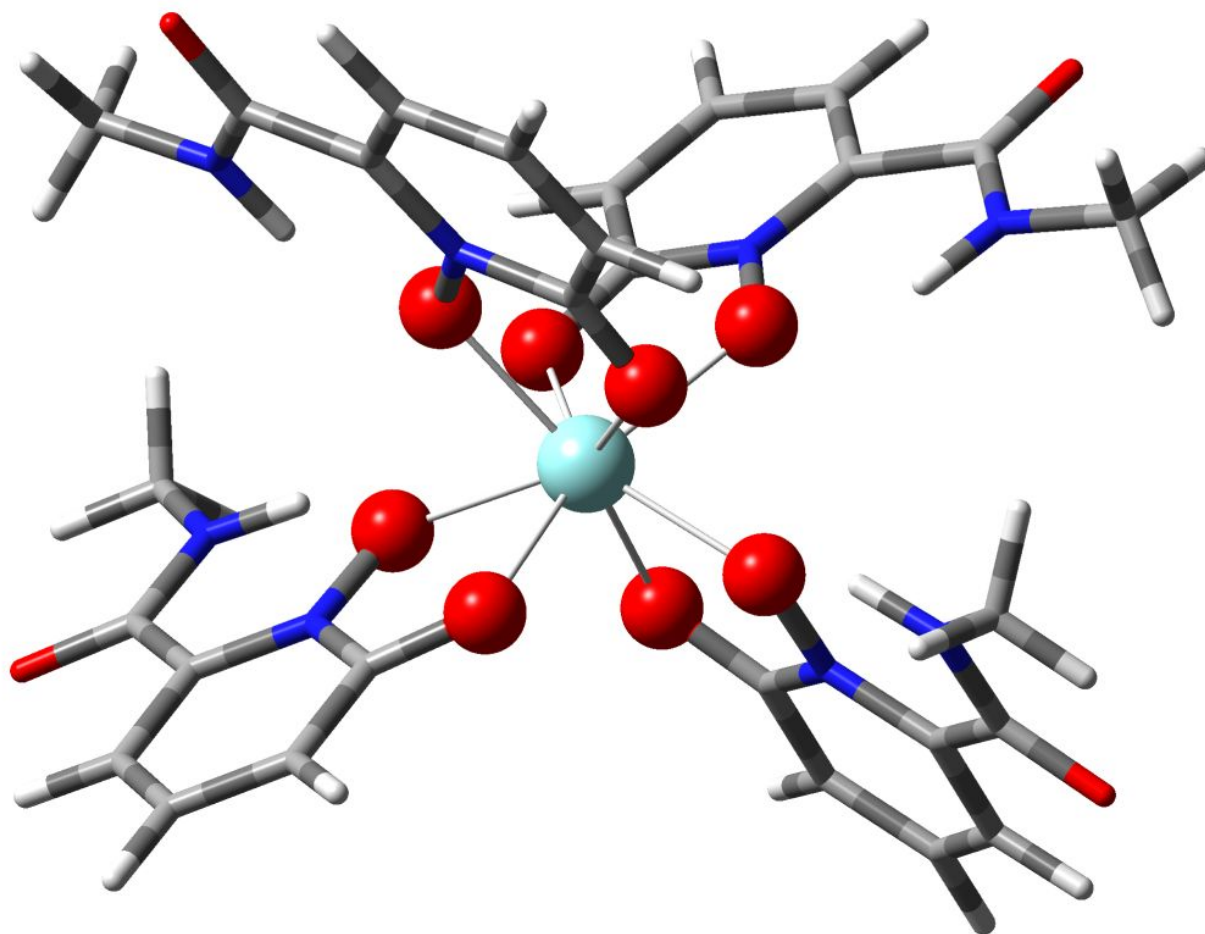

Figure S10. Optimized DFT structure of Zr bond by four free 1,2-HOPO groups. The geometry is a very close match to a previously reported crystal structure of Zr bound by four hydroxamate groups.<sup>35</sup>



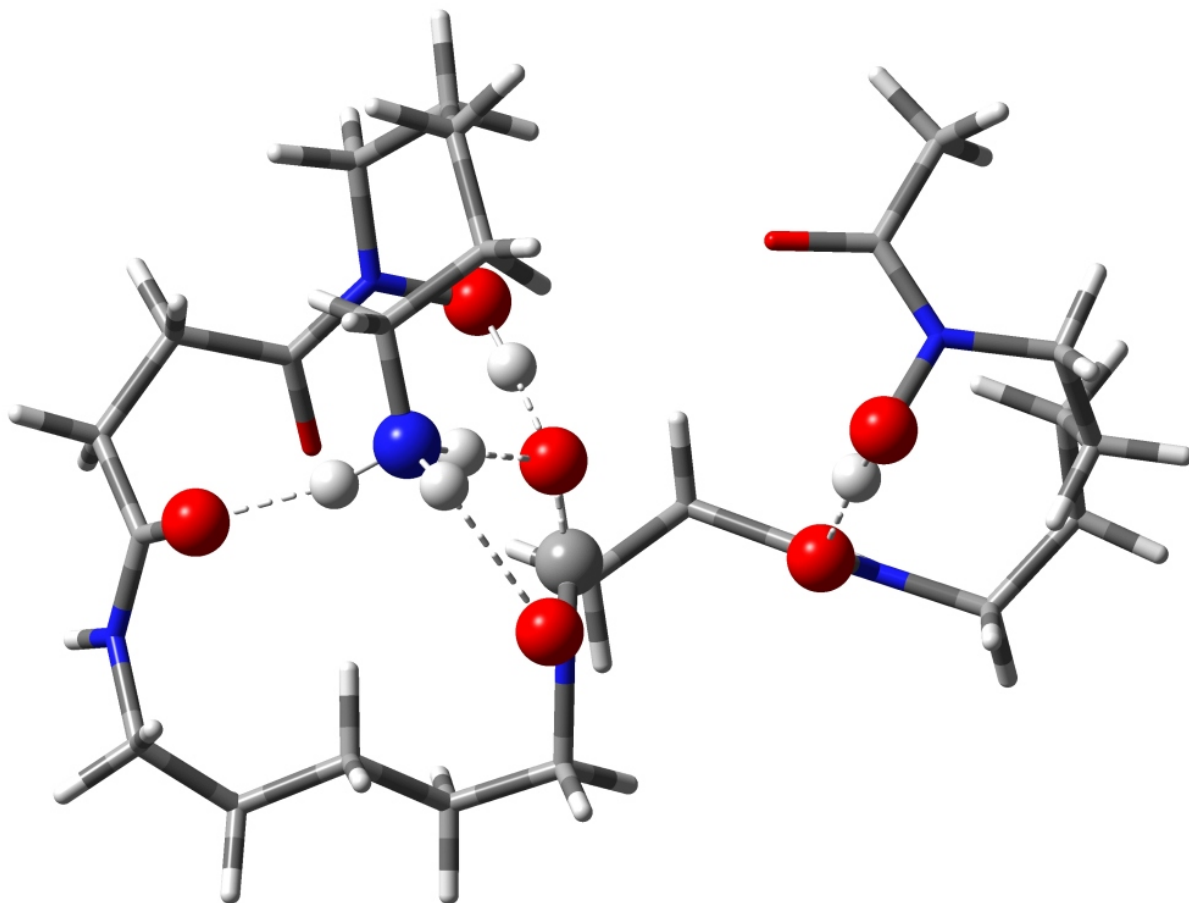

Figure S11. Optimized DFT structure of DFOH<sub>2</sub> (CPCM). The zwitterionic form was found to be more stable with the protonated amine tail forming hydrogen bonds with oxygens including a deprotonated hydroxylamine group.

Cartesian coordinates of optimized structures (gas phase)

Zr[3,4,3-(LI-1,2-HOPO)], I

|   |   |             |             |             |   |
|---|---|-------------|-------------|-------------|---|
| C | 0 | -1.23222400 | 1.60141000  | -2.98443100 | M |
| C | 0 | -0.77771400 | 1.91113600  | -4.27624200 | M |
| C | 0 | 0.19081800  | 1.08409800  | -4.90943400 | M |
| C | 0 | 0.67740500  | -0.06858800 | -4.27771900 | M |
| C | 0 | 0.20918400  | -0.40120300 | -2.97100800 | H |
| N | 0 | -0.70732800 | 0.47741000  | -2.37676900 | H |
| H | 0 | 0.54247800  | 1.34155300  | -5.90519700 | M |
| H | 0 | -1.21969800 | 2.76002600  | -4.78322500 | M |
| H | 0 | 1.39696600  | -0.73290900 | -4.74243600 | M |
| O | 0 | -1.12462800 | 0.07982700  | -1.10260700 | H |
| O | 0 | 0.53746700  | -1.43737000 | -2.23719100 | H |
| C | 0 | -2.43003700 | 2.37135800  | -2.42180900 | M |
| O | 0 | -3.37992500 | 2.58309800  | -3.24876000 | M |
| N | 0 | -2.47721800 | 2.86782100  | -1.13646400 | M |
| C | 0 | -1.40004800 | 2.81003500  | -0.11008700 | M |
| H | 0 | -1.89769600 | 2.59825600  | 0.84485300  | M |
| H | 0 | -0.75881800 | 1.95292000  | -0.29558700 | M |
| C | 0 | 4.28088800  | -1.35477400 | -1.13329500 | M |
| C | 0 | 5.13414200  | -2.33810900 | -1.65603700 | M |
| C | 0 | 4.70397400  | -3.69036000 | -1.73127600 | M |
| C | 0 | 3.42047800  | -4.05712100 | -1.30613300 | M |
| C | 0 | 2.53963400  | -3.06097900 | -0.78813400 | H |
| N | 0 | 3.02770900  | -1.75196500 | -0.69651800 | H |
| H | 0 | 5.37572000  | -4.44446900 | -2.13371100 | M |
| H | 0 | 6.10912000  | -2.01115200 | -1.99617000 | M |
| H | 0 | 3.04744300  | -5.07328500 | -1.36387400 | M |
| O | 0 | 2.12534800  | -0.85524800 | -0.09288000 | H |
| O | 0 | 1.30694700  | -3.24771500 | -0.37396200 | H |
| C | 0 | 4.76962900  | 0.09246400  | -1.10173300 | M |
| O | 0 | 5.92902800  | 0.34459800  | -1.57047600 | M |
| N | 0 | 3.94257400  | 1.05656100  | -0.59343100 | M |
| H | 0 | 3.06081000  | 0.74650000  | -0.18471800 | M |
| C | 0 | 4.40629700  | 2.46063100  | -0.50249600 | M |
| H | 0 | 5.10286300  | 2.55840200  | 0.34021700  | M |
| H | 0 | 4.97238600  | 2.66732100  | -1.41809300 | M |
| C | 0 | 1.87019800  | 0.77539800  | 3.16906400  | M |
| C | 0 | 2.30090200  | 0.41829100  | 4.45568600  | M |
| C | 0 | 1.88456600  | -0.81223100 | 5.03263200  | M |
| C | 0 | 1.13124200  | -1.72335500 | 4.28270700  | M |
| C | 0 | 0.74005700  | -1.38588700 | 2.95217800  | H |
| N | 0 | 1.00881500  | -0.08137800 | 2.50394700  | H |
| H | 0 | 2.20223200  | -1.06962100 | 6.03971700  | M |
| H | 0 | 3.01282900  | 1.06344900  | 4.95688300  | M |
| H | 0 | 0.86267600  | -2.70786900 | 4.64867200  | M |
| O | 0 | 0.39396700  | 0.26281200  | 1.28425800  | H |
| O | 0 | 0.17330900  | -2.18178100 | 2.07790300  | H |
| C | 0 | 2.60942900  | 1.88918500  | 2.43149800  | M |
| O | 0 | 3.87999900  | 1.79601000  | 2.43254000  | M |
| N | 0 | 1.94895100  | 2.93266500  | 1.81730200  | M |
| C | 0 | 2.81960900  | 3.90616900  | 1.08314900  | M |
| H | 0 | 2.27236600  | 4.84904100  | 1.01882000  | M |
| H | 0 | 3.72249800  | 4.07902700  | 1.68375100  | M |

|    |   |             |             |             |   |
|----|---|-------------|-------------|-------------|---|
| C  | 0 | -4.47294000 | -1.81500700 | 0.82513400  | M |
| C  | 0 | -5.37183400 | -2.87717100 | 0.63626500  | M |
| C  | 0 | -4.91088600 | -4.12311200 | 0.13713400  | M |
| C  | 0 | -3.56225600 | -4.29189900 | -0.21158300 | M |
| C  | 0 | -2.65186000 | -3.21385100 | -0.02513800 | H |
| N  | 0 | -3.13163900 | -2.03700600 | 0.55578200  | H |
| H  | 0 | -5.61283000 | -4.94131700 | 0.00000400  | M |
| H  | 0 | -6.41451900 | -2.68243500 | 0.85618700  | M |
| H  | 0 | -3.17199700 | -5.21010200 | -0.63542000 | M |
| O  | 0 | -2.14650600 | -1.09057300 | 0.84800500  | H |
| O  | 0 | -1.37373100 | -3.19969200 | -0.35714400 | H |
| C  | 0 | -5.02956000 | -0.44035500 | 1.17421300  | M |
| O  | 0 | -6.25674300 | -0.35026900 | 1.50393700  | M |
| N  | 0 | -4.20324300 | 0.64416200  | 1.00550700  | M |
| H  | 0 | -3.21870100 | 0.44982100  | 0.81134500  | M |
| C  | 0 | -4.73459100 | 2.02065700  | 1.10307100  | M |
| H  | 0 | -4.08548000 | 2.60806700  | 1.76952600  | M |
| H  | 0 | -5.71224000 | 1.93518600  | 1.58594100  | M |
| C  | 0 | 3.23975500  | 3.48132700  | -0.35931200 | M |
| H  | 0 | 2.36213400  | 3.12262000  | -0.91540800 | M |
| H  | 0 | 3.56401200  | 4.40894700  | -0.85605900 | M |
| C  | 0 | 0.54840000  | 3.26490900  | 2.26327500  | M |
| H  | 0 | -0.03541400 | 2.34322400  | 2.18440200  | M |
| H  | 0 | 0.58615600  | 3.55392900  | 3.32581500  | M |
| C  | 0 | -0.17926100 | 4.40307300  | 1.50229000  | M |
| H  | 0 | 0.38635900  | 5.34260400  | 1.57040600  | M |
| H  | 0 | -1.10400700 | 4.57786000  | 2.07632400  | M |
| C  | 0 | -0.57932100 | 4.12753600  | 0.02532400  | M |
| H  | 0 | 0.30569700  | 4.08239300  | -0.62267700 | M |
| H  | 0 | -1.17784100 | 4.97971900  | -0.32745900 | M |
| C  | 0 | -3.71785900 | 3.61911900  | -0.75985300 | M |
| H  | 0 | -4.04482100 | 4.18477700  | -1.63841100 | M |
| H  | 0 | -3.43556600 | 4.33306700  | 0.02539400  | M |
| C  | 0 | -4.90642900 | 2.74291600  | -0.27304600 | M |
| H  | 0 | -5.16190400 | 2.00740900  | -1.04476900 | M |
| H  | 0 | -5.76930100 | 3.42226600  | -0.18892700 | M |
| Zr | 0 | -0.03898100 | -1.53592300 | -0.02999300 | H |

## Zr[3,3,3-(LI-1,2-HOPO)], II

|   |   |             |             |             |   |
|---|---|-------------|-------------|-------------|---|
| C | 0 | -0.80378600 | 1.81417600  | -2.88042100 | M |
| C | 0 | -0.22144600 | 2.14064800  | -4.11534000 | M |
| C | 0 | 0.66673500  | 1.22707700  | -4.74739700 | M |
| C | 0 | 0.95253000  | -0.01759800 | -4.16897100 | M |
| C | 0 | 0.35905400  | -0.36258500 | -2.91735800 | H |
| N | 0 | -0.49140300 | 0.58558100  | -2.33105000 | H |
| H | 0 | 1.11889200  | 1.49493300  | -5.69888100 | M |
| H | 0 | -0.50156500 | 3.07832800  | -4.57945700 | M |
| H | 0 | 1.61462700  | -0.74051600 | -4.63180000 | M |
| O | 0 | -1.06311900 | 0.16218100  | -1.12756000 | H |
| O | 0 | 0.51925800  | -1.46578700 | -2.22576400 | H |
| C | 0 | -1.90911200 | 2.71095000  | -2.31850200 | M |
| O | 0 | -2.76043000 | 3.13205500  | -3.17133800 | M |
| N | 0 | -1.96933000 | 3.09215900  | -0.99019500 | M |
| C | 0 | -0.98434000 | 2.68901100  | 0.05881900  | M |
| C | 0 | 4.21006100  | -1.36716000 | -0.99402900 | M |
| C | 0 | 5.07821200  | -2.35472600 | -1.48272700 | M |
| C | 0 | 4.64871300  | -3.70742800 | -1.55959800 | M |
| C | 0 | 3.35304500  | -4.07099100 | -1.16994200 | M |
| C | 0 | 2.45615900  | -3.07079000 | -0.68794700 | H |
| N | 0 | 2.94412500  | -1.76121700 | -0.59344800 | H |
| H | 0 | 5.33168800  | -4.46516000 | -1.93542000 | M |
| H | 0 | 6.06317700  | -2.03189100 | -1.79702900 | M |
| H | 0 | 2.98221300  | -5.08777000 | -1.23088000 | M |
| O | 0 | 2.02711700  | -0.85602800 | -0.02553200 | H |
| O | 0 | 1.21105100  | -3.25266400 | -0.30958600 | H |
| C | 0 | 4.69596200  | 0.08131600  | -0.95667600 | M |
| O | 0 | 5.86168100  | 0.33375700  | -1.40875900 | M |
| N | 0 | 3.86242700  | 1.04602400  | -0.45693000 | M |
| H | 0 | 2.97512600  | 0.73548400  | -0.06075200 | M |
| C | 0 | 4.32595500  | 2.44965000  | -0.35953500 | M |
| H | 0 | 4.99075200  | 2.55216900  | 0.50872700  | M |
| H | 0 | 4.92799400  | 2.64640700  | -1.25373000 | M |
| C | 0 | 1.59852300  | 0.80088900  | 3.26491600  | M |
| C | 0 | 1.95022000  | 0.46090200  | 4.57972400  | M |
| C | 0 | 1.51145900  | -0.77143900 | 5.13710200  | M |
| C | 0 | 0.81693000  | -1.69856600 | 4.34931900  | M |
| C | 0 | 0.50427500  | -1.37593600 | 2.99426300  | H |
| N | 0 | 0.79250900  | -0.07281800 | 2.55668500  | H |
| H | 0 | 1.76764100  | -1.01793800 | 6.16423600  | M |
| H | 0 | 2.62117500  | 1.11736700  | 5.12125000  | M |
| H | 0 | 0.53674600  | -2.68232100 | 4.70861700  | M |
| O | 0 | 0.25960000  | 0.26224900  | 1.30278500  | H |
| O | 0 | -0.00693800 | -2.17616900 | 2.08927200  | H |
| C | 0 | 2.37898200  | 1.89836000  | 2.54413700  | M |
| O | 0 | 3.64675100  | 1.80325500  | 2.62012800  | M |
| N | 0 | 1.76976700  | 2.91986800  | 1.84115700  | M |
| C | 0 | 2.69194300  | 3.88862400  | 1.16405700  | M |
| H | 0 | 2.15745200  | 4.84333900  | 1.10257700  | M |
| H | 0 | 3.56987500  | 4.03165800  | 1.80668800  | M |
| C | 0 | -4.59923200 | -1.56767300 | 0.52412900  | M |
| C | 0 | -5.55262200 | -2.55566500 | 0.23236100  | M |
| C | 0 | -5.14039600 | -3.81988500 | -0.26552900 | M |
| C | 0 | -3.78332000 | -4.08135100 | -0.50980100 | M |

|    |   |             |             |             |   |
|----|---|-------------|-------------|-------------|---|
| C  | 0 | -2.81547800 | -3.07766800 | -0.22191100 | H |
| N  | 0 | -3.26102000 | -1.88305000 | 0.35046300  | H |
| H  | 0 | -5.88531800 | -4.58073900 | -0.48288800 | M |
| H  | 0 | -6.59366100 | -2.29263900 | 0.37620000  | M |
| H  | 0 | -3.42846900 | -5.01657600 | -0.92746800 | M |
| O  | 0 | -2.23753600 | -1.01552000 | 0.74064000  | H |
| O  | 0 | -1.51607800 | -3.14241500 | -0.45025000 | H |
| C  | 0 | -5.07443900 | -0.16477900 | 0.88749400  | M |
| O  | 0 | -6.31166000 | 0.01304800  | 1.13139500  | M |
| N  | 0 | -4.14892900 | 0.84777800  | 0.83092600  | M |
| H  | 0 | -3.17529100 | 0.57007900  | 0.69256400  | M |
| C  | 0 | -4.54324700 | 2.26379400  | 0.97882200  | M |
| H  | 0 | -3.91142200 | 2.72915200  | 1.75111500  | M |
| H  | 0 | -5.57118000 | 2.25669400  | 1.35264600  | M |
| C  | 0 | 3.16336600  | 3.48156900  | -0.26491300 | M |
| H  | 0 | 2.30673700  | 3.14016400  | -0.86314500 | M |
| H  | 0 | 3.52167100  | 4.40946700  | -0.73673800 | M |
| C  | 0 | 0.37873600  | 3.37277300  | 2.14307000  | M |
| H  | 0 | -0.14182500 | 2.55019000  | 2.64308600  | M |
| H  | 0 | 0.45101900  | 4.20552400  | 2.86322600  | M |
| C  | 0 | -0.46426800 | 3.85829000  | 0.93164100  | M |
| C  | 0 | -3.17664800 | 3.89713100  | -0.61175700 | M |
| H  | 0 | -3.36825600 | 4.58935300  | -1.43761600 | M |
| H  | 0 | -2.92525900 | 4.48834100  | 0.27421200  | M |
| C  | 0 | -4.48064900 | 3.08992900  | -0.34706900 | M |
| H  | 0 | -4.69489400 | 2.43654700  | -1.20086500 | M |
| H  | 0 | -5.29147900 | 3.83437600  | -0.31381200 | M |
| Zr | 0 | -0.13388400 | -1.52716300 | -0.03042700 | H |
| H  | 0 | 0.09691000  | 4.57530000  | 0.31675200  | M |
| H  | 0 | -1.30089700 | 4.41885200  | 1.36962000  | M |
| H  | 0 | -0.13917900 | 2.20489000  | -0.42609700 | M |
| H  | 0 | -1.42550900 | 1.92436300  | 0.70284300  | M |

[ZrDFO(H<sub>2</sub>O)<sub>2</sub>]<sup>2+</sup> with non hydrogen bonded amine group, **III**

|    |             |             |             |
|----|-------------|-------------|-------------|
| Zr | 0.51294000  | -0.56367600 | 1.31312000  |
| N  | -8.36488900 | -4.47147000 | -2.52212900 |
| C  | -7.40649400 | -3.24073600 | -2.58617200 |
| C  | -6.41532600 | -3.23871700 | -1.40213900 |
| C  | -5.47950400 | -1.99378200 | -1.47141700 |
| C  | -4.46685500 | -1.94006200 | -0.29190300 |
| C  | -3.59193900 | -0.66363500 | -0.39101600 |
| N  | -2.55856400 | -0.57508900 | 0.67107200  |
| C  | -2.48120400 | 0.27028000  | 1.71587000  |
| C  | -3.69248100 | 1.00100600  | 2.28535300  |
| C  | -3.57444600 | 2.54780600  | 2.24813900  |
| C  | -3.78174000 | 3.09453000  | 0.82001400  |
| O  | -4.31054200 | 2.37463100  | -0.08849800 |
| N  | -3.36066700 | 4.38154100  | 0.59777100  |
| C  | -3.36756400 | 5.02339400  | -0.74385900 |
| C  | -1.94301100 | 5.07915300  | -1.36485600 |
| C  | -1.30279900 | 3.67618700  | -1.52974500 |
| C  | 0.16049900  | 3.72034500  | -2.03768600 |
| C  | 0.84878300  | 2.33199900  | -2.03720200 |
| N  | 1.02154800  | 1.74791200  | -0.67417100 |
| C  | 2.05775600  | 1.84597300  | 0.16414300  |
| C  | 3.18312900  | 2.85532700  | 0.00683700  |
| C  | 4.58411500  | 2.18673100  | -0.01275100 |
| C  | 4.75797600  | 1.29918800  | -1.26064300 |
| O  | 3.77603800  | 1.06811200  | -2.03699400 |
| N  | 6.00511700  | 0.75846200  | -1.47091200 |
| C  | 6.29117200  | -0.17789200 | -2.58920500 |
| C  | 6.61179000  | -1.61945200 | -2.10359900 |
| C  | 5.54197700  | -2.26450900 | -1.17794700 |
| C  | 4.15711900  | -2.50302600 | -1.84128200 |
| C  | 3.18164500  | -3.32691900 | -0.95632600 |
| N  | 2.61354300  | -2.55440800 | 0.18632400  |
| C  | 3.01311000  | -2.43684800 | 1.46303900  |
| C  | 4.18486200  | -3.19323300 | 2.05627100  |
| O  | -1.39225800 | -1.35897700 | 0.42185600  |
| O  | -1.31295000 | 0.37412700  | 2.31508100  |
| O  | 0.04313100  | 0.78606300  | -0.28472600 |
| O  | 2.04412800  | 1.02725200  | 1.20749200  |
| O  | 1.49365600  | -1.75338300 | -0.17507100 |
| O  | 2.31089500  | -1.62241300 | 2.22473100  |
| H  | -9.02445800 | -4.46740400 | -3.31171500 |
| H  | -7.82803800 | -5.34804900 | -2.55365600 |
| H  | -8.90701900 | -4.46010500 | -1.64826700 |
| H  | -8.05540500 | -2.35900500 | -2.58480500 |
| H  | -6.89843300 | -3.30989300 | -3.55343200 |
| H  | -6.96830100 | -3.22541800 | -0.45006300 |
| H  | -5.80604400 | -4.15560700 | -1.41879300 |
| H  | -6.09000000 | -1.07809500 | -1.46797600 |
| H  | -4.92769100 | -2.00446600 | -2.42372400 |
| H  | -3.81879800 | -2.82745700 | -0.30813500 |
| H  | -5.01016100 | -1.94541400 | 0.66537900  |
| H  | -4.18597400 | 0.25487600  | -0.36070900 |
| H  | -3.02450100 | -0.66383400 | -1.32875700 |
| H  | -4.60712300 | 0.69353800  | 1.77400700  |

|   |             |             |             |
|---|-------------|-------------|-------------|
| H | -3.76352700 | 0.68131900  | 3.33409700  |
| H | -2.59967400 | 2.86252300  | 2.64217800  |
| H | -4.34483200 | 2.97580000  | 2.90515300  |
| H | -2.94987200 | 4.89710000  | 1.36875000  |
| H | -4.04231500 | 4.43408600  | -1.37187100 |
| H | -3.78452200 | 6.03360300  | -0.64620800 |
| H | -2.01624300 | 5.58548000  | -2.33945300 |
| H | -1.29607200 | 5.71168000  | -0.73422700 |
| H | -1.91263100 | 3.07341800  | -2.21994600 |
| H | -1.32418500 | 3.14951300  | -0.56687700 |
| H | 0.19428000  | 4.10393400  | -3.06892600 |
| H | 0.74871800  | 4.42333200  | -1.42665200 |
| H | 1.83832300  | 2.35365700  | -2.50272900 |
| H | 0.24338200  | 1.59507800  | -2.57361500 |
| H | 3.03820900  | 3.45121800  | -0.89731000 |
| H | 3.13362600  | 3.53344600  | 0.87014200  |
| H | 4.71264900  | 1.57421500  | 0.88978800  |
| H | 5.35692900  | 2.96696500  | 0.00796500  |
| H | 6.76058400  | 1.00693900  | -0.84114300 |
| H | 5.40925800  | -0.16214600 | -3.23486000 |
| H | 7.13797800  | 0.21085400  | -3.16968800 |
| H | 6.75832300  | -2.24496800 | -2.99755800 |
| H | 7.57596200  | -1.61524300 | -1.57143800 |
| H | 5.42157400  | -1.63452500 | -0.28312800 |
| H | 5.94419300  | -3.23011400 | -0.83090100 |
| H | 3.67457800  | -1.55456600 | -2.10678500 |
| H | 4.29393200  | -3.07072000 | -2.77490200 |
| H | 3.67046200  | -4.22535600 | -0.55988700 |
| H | 2.30889000  | -3.63890800 | -1.53813600 |
| H | 4.96526900  | -2.47999900 | 2.34670700  |
| H | 3.85207000  | -3.70051700 | 2.96874400  |
| H | 4.61732500  | -3.92627700 | 1.37348100  |
| O | -0.26060200 | -2.64698400 | 2.20488600  |
| H | -1.03059300 | -2.81089700 | 1.61288900  |
| H | 0.08949800  | -3.41120900 | 2.69538200  |
| O | 0.86709300  | -0.06962200 | 3.51260300  |
| H | 1.72608600  | -0.31741400 | 3.90156600  |
| H | 0.24194700  | 0.40434100  | 4.08759100  |

[ZrDFO(H<sub>2</sub>O)<sub>2</sub>]<sup>2+</sup> with hydrogen bonded amine group, **IIIa**

|    |             |             |             |
|----|-------------|-------------|-------------|
| Zr | 0.07347200  | -0.92732700 | -1.26674700 |
| N  | -0.89282600 | 0.00719600  | 2.23131500  |
| C  | -0.89247200 | -0.24855200 | 3.73860200  |
| C  | -0.54621200 | -1.70477500 | 4.15699500  |
| C  | 0.95958300  | -2.12057200 | 4.30389100  |
| C  | 1.62984200  | -2.84551300 | 3.08656300  |
| C  | 2.56330600  | -1.94448400 | 2.22154000  |
| N  | 2.17431300  | -1.94804000 | 0.77890200  |
| C  | 2.92510600  | -1.83318100 | -0.32477800 |
| C  | 4.40013100  | -2.20275300 | -0.39282600 |
| C  | 5.30075900  | -1.05884900 | -0.92759800 |
| C  | 5.28552900  | 0.14530400  | 0.03571800  |
| O  | 4.70224700  | 0.06139600  | 1.16358900  |
| N  | 5.90128500  | 1.28991000  | -0.40841900 |
| C  | 5.92834400  | 2.55341800  | 0.37791100  |
| C  | 4.73927300  | 3.49923900  | 0.04573600  |
| C  | 3.36471100  | 2.83268400  | 0.31563700  |
| C  | 2.15711700  | 3.79298200  | 0.18318500  |
| C  | 0.82028400  | 3.13250700  | 0.61103400  |
| N  | 0.32439600  | 2.07036500  | -0.31356900 |
| C  | -0.67750200 | 2.10890700  | -1.20112400 |
| C  | -1.49507900 | 3.35645100  | -1.48581700 |
| C  | -3.00853400 | 3.09803400  | -1.24473100 |
| C  | -3.35827700 | 2.59722600  | 0.17340500  |
| O  | -2.48862800 | 2.04124100  | 0.93195300  |
| N  | -4.67253100 | 2.72462600  | 0.52619100  |
| C  | -5.29222400 | 2.08956800  | 1.71981900  |
| C  | -6.27861800 | 0.95417400  | 1.31760900  |
| C  | -5.66849400 | -0.16756400 | 0.42955100  |
| C  | -4.61898600 | -1.05478000 | 1.15090000  |
| C  | -3.99950200 | -2.15523700 | 0.25053400  |
| N  | -2.93056100 | -1.66455300 | -0.67095800 |
| C  | -2.85991900 | -1.74872600 | -2.01385100 |
| C  | -4.05510300 | -2.09124900 | -2.88367100 |
| O  | 0.77532900  | -1.76363400 | 0.57589800  |
| O  | 2.28036600  | -1.47937100 | -1.43223800 |
| O  | 0.81032300  | 0.74735200  | -0.06639100 |
| O  | -0.97021600 | 0.97501300  | -1.81152500 |
| O  | -1.68349300 | -1.38671400 | -0.02879600 |
| O  | -1.67819000 | -1.54763900 | -2.55659500 |
| H  | 0.04913100  | 0.07560600  | 1.81563300  |
| H  | -1.34344100 | -0.75693700 | 1.68959000  |
| H  | -1.41580900 | 0.86549600  | 1.97362100  |
| H  | -1.90550300 | -0.00468500 | 4.07743800  |
| H  | -0.20531400 | 0.47441600  | 4.19302300  |
| H  | -1.01359000 | -1.82573200 | 5.14451000  |
| H  | -1.06863900 | -2.41147100 | 3.49348800  |
| H  | 1.00539600  | -2.80539700 | 5.16008000  |
| H  | 1.55790400  | -1.24467600 | 4.60215000  |
| H  | 0.85505000  | -3.27615600 | 2.44324400  |
| H  | 2.22379600  | -3.68478700 | 3.46871300  |
| H  | 3.60936600  | -2.24919600 | 2.28484300  |
| H  | 2.53553900  | -0.89369600 | 2.53787000  |
| H  | 4.75695200  | -2.52703900 | 0.58590400  |



|   |             |             |             |
|---|-------------|-------------|-------------|
| H | 4.47661800  | -3.05826000 | -1.07981100 |
| H | 4.96968600  | -0.74548200 | -1.92661500 |
| H | 6.32609600  | -1.43908100 | -1.03150600 |
| H | 6.37157300  | 1.27396900  | -1.30695300 |
| H | 5.90460600  | 2.27797300  | 1.43761100  |
| H | 6.88304000  | 3.05362300  | 0.17735000  |
| H | 4.85084700  | 4.40107100  | 0.66774000  |
| H | 4.80669100  | 3.82934300  | -1.00317700 |
| H | 3.37358400  | 2.40610100  | 1.32865900  |
| H | 3.22326500  | 1.98329300  | -0.36442700 |
| H | 2.30164900  | 4.66584900  | 0.83856500  |
| H | 2.06861500  | 4.18227800  | -0.84256000 |
| H | 0.02712600  | 3.87862200  | 0.71504400  |
| H | 0.94407000  | 2.64554300  | 1.58548400  |
| H | -1.14657900 | 4.20367300  | -0.89089900 |
| H | -1.36275900 | 3.62343700  | -2.54246300 |
| H | -3.35061200 | 2.33008000  | -1.95197100 |
| H | -3.56463600 | 4.01693200  | -1.47018500 |
| H | -5.29197100 | 3.21803800  | -0.10953900 |
| H | -4.47488500 | 1.71988700  | 2.34393300  |
| H | -5.82481600 | 2.85853400  | 2.29242700  |
| H | -6.68856100 | 0.52233500  | 2.24283200  |
| H | -7.13345600 | 1.39875400  | 0.78607600  |
| H | -5.21992000 | 0.28326900  | -0.46959100 |
| H | -6.49255400 | -0.80766900 | 0.07938500  |
| H | -3.81091300 | -0.43680100 | 1.56193300  |
| H | -5.09816300 | -1.56386100 | 2.00017300  |
| H | -4.77168100 | -2.64049800 | -0.35660600 |
| H | -3.51930500 | -2.92926800 | 0.86212000  |
| H | -3.90664900 | -1.63057900 | -3.86347700 |
| H | -4.12339700 | -3.17800500 | -3.02975200 |
| H | -4.99970000 | -1.74010000 | -2.46077600 |
| O | 0.34993100  | -3.00396900 | -2.37585900 |
| H | -0.34544200 | -3.21689800 | -3.02867700 |
| O | 1.01877500  | -0.31861000 | -3.27477500 |
| H | 1.95412300  | -0.59866200 | -3.34092100 |
| H | 1.17997000  | -3.50120100 | -2.49773900 |
| H | 0.68624600  | 0.20849900  | -4.02364900 |

ZrDFO(OH)<sub>2</sub>, IV

|    |             |             |             |
|----|-------------|-------------|-------------|
| Zr | 0.38923500  | 0.30749800  | 1.25615500  |
| N  | -1.28893100 | 0.80555000  | -1.94847600 |
| C  | -0.95999200 | 1.99042200  | -2.84091000 |
| C  | -1.19578600 | 3.35709900  | -2.12724800 |
| C  | -0.12330900 | 4.44556500  | -2.45209700 |
| C  | 1.09586700  | 4.52315500  | -1.47764000 |
| C  | 2.15447900  | 3.37934500  | -1.57499200 |
| N  | 2.03229500  | 2.37997000  | -0.48834700 |
| C  | 3.02139900  | 1.69574700  | 0.12344300  |
| C  | 4.49245500  | 2.08630600  | -0.08361100 |
| C  | 5.44922600  | 1.19945000  | 0.75331000  |
| C  | 5.68536300  | -0.15986600 | 0.07247300  |
| O  | 5.99186600  | -0.22606100 | -1.16272500 |
| N  | 5.57805400  | -1.27941200 | 0.87466800  |
| C  | 5.74750600  | -2.65847400 | 0.36204100  |
| C  | 4.40280200  | -3.39640200 | 0.10796200  |
| C  | 3.45656500  | -2.63784400 | -0.86184900 |
| C  | 2.26787600  | -3.51292000 | -1.33971900 |
| C  | 1.16916400  | -2.70501400 | -2.09020200 |
| N  | 0.34259300  | -1.87248000 | -1.18689600 |
| C  | -0.70510600 | -2.24647300 | -0.42092900 |
| C  | -1.44404000 | -3.55634900 | -0.70940200 |
| C  | -2.95377400 | -3.40330300 | -0.41496300 |
| C  | -3.65790500 | -2.33689500 | -1.28026900 |
| O  | -3.04133900 | -1.56236100 | -2.08237300 |
| N  | -5.02029800 | -2.25342200 | -1.08524800 |
| C  | -5.87544200 | -1.17638300 | -1.63648800 |
| C  | -6.63886700 | -0.41818700 | -0.51369300 |
| C  | -5.74339000 | 0.18649900  | 0.60344200  |
| C  | -4.84382300 | 1.36928700  | 0.15579800  |
| C  | -3.95631700 | 1.93274900  | 1.30245100  |
| N  | -2.75537300 | 1.11571300  | 1.59251200  |
| C  | -2.46489900 | 0.42013300  | 2.71791100  |
| C  | -3.50944000 | 0.22349000  | 3.81494800  |
| O  | 0.70271600  | 1.98902500  | -0.17321500 |
| O  | 2.69011600  | 0.71529500  | 0.91470600  |
| O  | 0.79582800  | -0.52659100 | -0.97521400 |
| O  | -1.13627000 | -1.44489800 | 0.50439900  |
| O  | -1.66877800 | 1.33290400  | 0.69038600  |
| O  | -1.27042900 | -0.06161700 | 2.87364300  |
| H  | -0.37684400 | 0.29869700  | -1.66675600 |
| H  | -1.66760000 | 1.09850700  | -1.01020400 |
| H  | -1.93178800 | 0.10960400  | -2.34654400 |
| H  | -1.56029500 | 1.91556200  | -3.75638300 |
| H  | 0.09034600  | 1.88001200  | -3.12626600 |
| H  | -2.19069900 | 3.73551100  | -2.40870400 |
| H  | -1.19700100 | 3.18835300  | -1.04642500 |
| H  | -0.61548200 | 5.43013000  | -2.42256200 |
| H  | 0.24127700  | 4.32696700  | -3.48771700 |
| H  | 0.73276500  | 4.56929800  | -0.44395300 |
| H  | 1.61501200  | 5.47229100  | -1.68452600 |
| H  | 3.16436300  | 3.80154800  | -1.51908000 |
| H  | 2.07258500  | 2.86071200  | -2.54373100 |
| H  | 4.77220000  | 1.98778700  | -1.14071400 |

|   |             |             |             |
|---|-------------|-------------|-------------|
| H | 4.62732100  | 3.14108300  | 0.19849500  |
| H | 5.06054900  | 1.07734600  | 1.76942900  |
| H | 6.42424100  | 1.70606400  | 0.81397100  |
| H | 5.22962000  | -1.15552700 | 1.81778700  |
| H | 6.31091600  | -2.57481500 | -0.57335300 |
| H | 6.36046200  | -3.22966000 | 1.07938500  |
| H | 4.65061600  | -4.39536600 | -0.29384400 |
| H | 3.88086000  | -3.56718900 | 1.06582100  |
| H | 4.02842200  | -2.28979200 | -1.73523400 |
| H | 3.06772200  | -1.74287000 | -0.36589300 |
| H | 2.63516400  | -4.30526600 | -2.01411800 |
| H | 1.80464300  | -4.01747000 | -0.47752700 |
| H | 0.51272700  | -3.38483100 | -2.65032500 |
| H | 1.62179600  | -2.00737400 | -2.80351800 |
| H | -1.29059400 | -3.86549000 | -1.74825800 |
| H | -1.04304400 | -4.34984000 | -0.06193800 |
| H | -3.07904000 | -3.10567200 | 0.63417400  |
| H | -3.45839400 | -4.37113500 | -0.55113100 |
| H | -5.45483000 | -2.92319300 | -0.45675900 |
| H | -5.21627200 | -0.51239600 | -2.20231000 |
| H | -6.59956200 | -1.60549700 | -2.34694400 |
| H | -7.23925900 | 0.37596400  | -0.98855900 |
| H | -7.36478500 | -1.10900100 | -0.05066200 |
| H | -5.11144400 | -0.60669700 | 1.02890200  |
| H | -6.40378000 | 0.53290900  | 1.41702300  |
| H | -4.19092200 | 1.07000500  | -0.67400900 |
| H | -5.47831200 | 2.19047200  | -0.21465100 |
| H | -4.54905000 | 2.03561500  | 2.22072400  |
| H | -3.57907400 | 2.92704000  | 1.03135300  |
| H | -3.11871400 | -0.53097800 | 4.50153900  |
| H | -3.67204700 | 1.15352200  | 4.37911600  |
| H | -4.47525400 | -0.11251300 | 3.42349600  |
| O | 0.88658700  | 1.51136900  | 2.82176700  |
| H | 0.42339500  | 1.49627800  | 3.68413500  |
| O | 1.32747100  | -1.40627200 | 1.85676700  |
| H | 2.30351700  | -1.36323200 | 1.90980200  |

Zr(1,2-HOPO)<sub>4</sub>

|    |   |             |             |             |   |
|----|---|-------------|-------------|-------------|---|
| C  | 0 | 2.24941700  | 2.76647900  | -2.47700200 | M |
| C  | 0 | 1.93531200  | 3.38461000  | -3.69591300 | M |
| C  | 0 | 0.70521100  | 3.10123300  | -4.34706500 | M |
| C  | 0 | -0.20909300 | 2.20183500  | -3.78364100 | M |
| C  | 0 | 0.10008500  | 1.56785000  | -2.54304300 | H |
| N  | 0 | 1.32269100  | 1.88257200  | -1.94069200 | H |
| H  | 0 | 0.47417800  | 3.58678500  | -5.29149800 | M |
| H  | 0 | 2.66970700  | 4.07093900  | -4.09947400 | M |
| H  | 0 | -1.15660700 | 1.95811900  | -4.25032300 | M |
| O  | 0 | 1.53776700  | 1.22363600  | -0.71964500 | H |
| O  | 0 | -0.65240300 | 0.70931900  | -1.89204600 | H |
| C  | 0 | 3.58799100  | 3.09567200  | -1.81784800 | M |
| O  | 0 | 4.35293000  | 3.92955900  | -2.40260700 | M |
| N  | 0 | 3.89616200  | 2.47007500  | -0.63933700 | M |
| H  | 0 | 3.20014600  | 1.82903800  | -0.25550000 | M |
| C  | 0 | 5.16794800  | 2.72338600  | 0.06082600  | M |
| H  | 0 | 5.00070300  | 3.30461800  | 0.97814400  | M |
| H  | 0 | 5.64539800  | 1.77231600  | 0.32546200  | M |
| H  | 0 | 5.82567800  | 3.29187700  | -0.60018600 | M |
| Zr | 0 | 0.00024700  | -0.25688200 | -0.00029000 | H |
| C  | 0 | -3.76927600 | -2.68057000 | -0.33573300 | M |
| C  | 0 | -4.35757100 | -3.61145600 | 0.53382200  | M |
| C  | 0 | -3.73352600 | -3.93222100 | 1.76854700  | M |
| C  | 0 | -2.52289000 | -3.32718500 | 2.13493700  | M |
| C  | 0 | -1.91903800 | -2.38053400 | 1.25669100  | H |
| N  | 0 | -2.57530300 | -2.09369000 | 0.05662900  | H |
| H  | 0 | -4.19991200 | -4.65446700 | 2.43333900  | M |
| H  | 0 | -5.29031100 | -4.05883700 | 0.21253900  | M |
| H  | 0 | -2.01273400 | -3.54663400 | 3.06591600  | M |
| O  | 0 | -1.91753000 | -1.15042300 | -0.74256200 | H |
| O  | 0 | -0.78734200 | -1.73139900 | 1.44902000  | H |
| C  | 0 | -4.46670400 | -2.37001900 | -1.65879000 | M |
| O  | 0 | -5.56922900 | -2.95951200 | -1.90591600 | M |
| N  | 0 | -3.86610100 | -1.47884300 | -2.50786500 | M |
| H  | 0 | -2.97609300 | -1.07317900 | -2.20774500 | M |
| C  | 0 | -4.45096700 | -1.14598200 | -3.81802700 | M |
| H  | 0 | -4.59600000 | -0.06154900 | -3.90645500 | M |
| H  | 0 | -3.79288200 | -1.48200600 | -4.63060600 | M |
| H  | 0 | -5.41621500 | -1.64861300 | -3.90976600 | M |
| C  | 0 | -2.24951800 | 2.76404200  | 2.47881300  | M |
| C  | 0 | -1.93520100 | 3.38189300  | 3.69780900  | M |
| C  | 0 | -0.70477700 | 3.09871100  | 4.34844100  | M |
| C  | 0 | 0.20964600  | 2.19981600  | 3.78439900  | M |
| C  | 0 | -0.09973200 | 1.56615600  | 2.54368200  | H |
| N  | 0 | -1.32264600 | 1.88068500  | 1.94186400  | H |
| H  | 0 | -0.47357800 | 3.58402600  | 5.29295600  | M |
| H  | 0 | -2.66969700 | 4.06782900  | 4.10185900  | M |
| H  | 0 | 1.15740700  | 1.95627700  | 4.25067300  | M |
| O  | 0 | -1.53794600 | 1.22209100  | 0.72067000  | H |
| O  | 0 | 0.65282000  | 0.70809600  | 1.89213200  | H |
| C  | 0 | -3.58846200 | 3.09287400  | 1.82024300  | M |
| O  | 0 | -4.35352200 | 3.92638800  | 2.40536400  | M |
| N  | 0 | -3.89702500 | 2.46719500  | 0.64189800  | M |
| H  | 0 | -3.20078900 | 1.82682500  | 0.25735400  | M |

|   |   |             |             |             |   |
|---|---|-------------|-------------|-------------|---|
| C | 0 | -5.16933800 | 2.72023400  | -0.05740100 | M |
| H | 0 | -5.00499400 | 3.31324400  | -0.96773500 | M |
| H | 0 | -5.63946000 | 1.76888300  | -0.33360400 | M |
| H | 0 | -5.83208000 | 3.27677200  | 0.60880100  | M |
| C | 0 | 3.76933900  | -2.68139600 | 0.33399100  | M |
| C | 0 | 4.35767200  | -3.61167300 | -0.53618700 | M |
| C | 0 | 3.73399500  | -3.93113300 | -1.77143700 | M |
| C | 0 | 2.52369300  | -3.32538100 | -2.13774000 | M |
| C | 0 | 1.91981100  | -2.37932800 | -1.25886900 | H |
| N | 0 | 2.57573300  | -2.09373200 | -0.05832500 | H |
| H | 0 | 4.20040300  | -4.65293500 | -2.43669600 | M |
| H | 0 | 5.29013000  | -4.05966500 | -0.21493700 | M |
| H | 0 | 2.01380300  | -3.54384200 | -3.06909800 | M |
| O | 0 | 1.91803700  | -1.15085200 | 0.74138700  | H |
| O | 0 | 0.78836900  | -1.72969500 | -1.45103300 | H |
| C | 0 | 4.46630900  | -2.37234700 | 1.65764300  | M |
| O | 0 | 5.56858200  | -2.96239400 | 1.90459700  | M |
| N | 0 | 3.86540800  | -1.48211800 | 2.50749400  | M |
| H | 0 | 2.97592600  | -1.07548700 | 2.20711300  | M |
| C | 0 | 4.44972900  | -1.15071100 | 3.81826800  | M |
| H | 0 | 4.60839000  | -0.06782000 | 3.90308000  | M |
| H | 0 | 3.78417900  | -1.47500600 | 4.62944100  | M |
| H | 0 | 5.40834500  | -1.66484400 | 3.91550800  | M |

3,4,3-(LI-1,2-HOPO)H<sub>4</sub>

|   |             |             |             |
|---|-------------|-------------|-------------|
| C | -2.20811500 | 2.82795000  | 2.11987900  |
| C | -1.22503700 | 3.31664700  | 2.98040600  |
| C | -0.58246300 | 4.56188200  | 2.68518300  |
| C | -0.93253500 | 5.31722900  | 1.56809700  |
| C | -1.96329400 | 4.86100600  | 0.66874100  |
| N | -2.53951000 | 3.60492500  | 1.03134500  |
| H | 0.20110000  | 4.92436100  | 3.34529300  |
| H | -0.97313000 | 2.74338400  | 3.86461000  |
| H | -0.43625400 | 6.25060200  | 1.33167900  |
| O | -3.56324600 | 3.15601200  | 0.13498700  |
| O | -2.43205600 | 5.40416500  | -0.40169100 |
| C | -2.95586100 | 1.53242200  | 2.42931100  |
| O | -3.65749600 | 1.48638600  | 3.48869100  |
| N | -2.77181300 | 0.44123700  | 1.60654700  |
| C | -1.92854100 | 0.44143100  | 0.37596800  |
| H | -2.30765200 | -0.36069000 | -0.26923600 |
| H | -2.08473700 | 1.37569200  | -0.17106900 |
| C | 8.37401600  | -3.08409600 | 0.79645900  |
| C | 8.45381600  | -3.62065400 | 2.08251200  |
| C | 9.72641000  | -3.79793000 | 2.71216900  |
| C | 10.91171500 | -3.44478200 | 2.07132700  |
| C | 10.88193500 | -2.88545000 | 0.74144000  |
| N | 9.57253800  | -2.74428700 | 0.18812900  |
| H | 9.76362000  | -4.21789500 | 3.71419300  |
| H | 7.52123200  | -3.88871600 | 2.56325700  |
| H | 11.88541200 | -3.57042400 | 2.53125700  |
| O | 9.60573900  | -2.18350100 | -1.13144000 |
| O | 11.84844300 | -2.49763100 | -0.01510800 |
| C | 6.99909900  | -2.91148600 | 0.15658200  |
| O | 5.97266500  | -3.25918200 | 0.82497100  |
| N | 6.91774300  | -2.40051200 | -1.11278300 |
| H | 7.77104000  | -2.12452900 | -1.58820500 |
| C | 5.60386500  | -2.22704200 | -1.77147900 |
| H | 5.77285300  | -2.24128100 | -2.85559000 |
| H | 4.97869100  | -3.08837500 | -1.50632700 |
| C | 2.20837300  | 2.82808700  | -2.11979000 |
| C | 1.22536300  | 3.31696000  | -2.98029200 |
| C | 0.58301200  | 4.56230400  | -2.68503500 |
| C | 0.93322100  | 5.31757200  | -1.56793900 |
| C | 1.96387900  | 4.86113800  | -0.66857000 |
| N | 2.53989100  | 3.60497900  | -1.03123000 |
| H | -0.20048500 | 4.92493600  | -3.34514100 |
| H | 0.97333800  | 2.74376800  | -3.86450700 |
| H | 0.43712200  | 6.25104400  | -1.33152700 |
| O | 3.56354400  | 3.15584400  | -0.13489100 |
| O | 2.43273100  | 5.40418800  | 0.40187200  |
| C | 2.95600900  | 1.53250000  | -2.42927000 |
| O | 3.65785500  | 1.48651300  | -3.48850400 |
| N | 2.77169500  | 0.44124300  | -1.60665200 |
| C | 3.47597500  | -0.82113900 | -1.97760500 |
| H | 2.85276900  | -1.66066600 | -1.64183100 |
| H | 3.54726600  | -0.85536300 | -3.06985100 |
| C | -8.37429900 | -3.08372400 | -0.79654800 |
| C | -8.45407700 | -3.62007300 | -2.08269000 |

|   |              |             |             |
|---|--------------|-------------|-------------|
| C | -9.72666400  | -3.79732400 | -2.71236800 |
| C | -10.91198600 | -3.44436200 | -2.07145700 |
| C | -10.88223200 | -2.88525500 | -0.74147600 |
| N | -9.57283900  | -2.74408800 | -0.18815300 |
| H | -9.76385300  | -4.21712400 | -3.71446200 |
| H | -7.52148100  | -3.88800000 | -2.56348700 |
| H | -11.88567900 | -3.56999200 | -2.53140000 |
| O | -9.60606900  | -2.18353300 | 1.13151200  |
| O | -11.84876400 | -2.49765000 | 0.01515300  |
| C | -6.99938500  | -2.91113000 | -0.15665900 |
| O | -5.97294100  | -3.25871100 | -0.82509700 |
| N | -6.91802300  | -2.40028800 | 1.11275400  |
| H | -7.77131700  | -2.12443900 | 1.58825400  |
| C | -5.60413600  | -2.22687100 | 1.77145000  |
| H | -4.97899800  | -3.08824400 | 1.50633200  |
| H | -5.77313400  | -2.24106800 | 2.85555900  |
| C | 4.89192500   | -0.91264400 | -1.34894600 |
| H | 5.48467600   | -0.04675200 | -1.66896200 |
| H | 4.81862000   | -0.88653800 | -0.25428300 |
| C | 1.92840800   | 0.44144700  | -0.37608100 |
| H | 2.30750600   | -0.36067300 | 0.26913400  |
| H | 2.08459800   | 1.37570900  | 0.17095400  |
| C | 0.41527000   | 0.22615200  | -0.65722100 |
| H | 0.26750100   | -0.71760300 | -1.20292900 |
| H | 0.06196800   | 1.03182200  | -1.31675000 |
| C | -0.41539900  | 0.22614600  | 0.65709900  |
| H | -0.06210100  | 1.03181600  | 1.31663000  |
| H | -0.26761600  | -0.71760900 | 1.20280500  |
| C | -3.47613800  | -0.82112500 | 1.97748800  |
| H | -3.54736500  | -0.85540000 | 3.06973600  |
| H | -2.85299900  | -1.66067000 | 1.64163300  |
| C | -4.89212400  | -0.91251800 | 1.34889600  |
| H | -4.81886600  | -0.88640100 | 0.25423300  |
| H | -5.48480000  | -0.04659000 | 1.66895600  |
| H | -10.60632800 | -2.06118500 | 1.24773000  |
| H | -3.60440700  | 3.93956500  | -0.49926300 |
| H | 3.60483100   | 3.93933900  | 0.49941200  |
| H | 10.60598900  | -2.06107200 | -1.24763700 |

3,3,3-(LI-1,2-HOPO)H<sub>4</sub>

|   |             |             |             |
|---|-------------|-------------|-------------|
| C | -0.51872700 | 5.01900300  | 0.50295100  |
| C | 0.20588700  | 5.91439900  | 1.28802900  |
| C | 1.39704500  | 6.51138600  | 0.75973000  |
| C | 1.84357600  | 6.23587100  | -0.53120800 |
| C | 1.11000400  | 5.32981900  | -1.38405600 |
| N | -0.05292700 | 4.77034400  | -0.77095400 |
| H | 1.96004300  | 7.20175700  | 1.38323400  |
| H | -0.16088800 | 6.15846100  | 2.27780300  |
| H | 2.73983700  | 6.68420500  | -0.94488500 |
| O | -0.77635200 | 3.86873400  | -1.61713000 |
| O | 1.33874000  | 4.95883000  | -2.59338100 |
| C | -1.85412300 | 4.43682900  | 0.95928800  |
| O | -2.80343100 | 5.24977300  | 1.18882900  |
| N | -1.96184000 | 3.07133400  | 1.14323300  |
| C | -0.84127800 | 2.11046800  | 0.93267900  |
| H | -1.07941200 | 1.46817600  | 0.07635000  |
| H | 0.05195200  | 2.68100800  | 0.66551200  |
| C | 7.26148800  | -0.75510800 | -1.00392000 |
| C | 8.20989200  | 0.01608600  | -0.32988600 |
| C | 9.58384300  | -0.38250100 | -0.31394700 |
| C | 10.01449500 | -1.53857200 | -0.96099200 |
| C | 9.07251500  | -2.36965900 | -1.67073400 |
| N | 7.72463900  | -1.89793100 | -1.63722800 |
| H | 10.30452500 | 0.23432600  | 0.21705900  |
| H | 7.85443100  | 0.91036000  | 0.16669000  |
| H | 11.05054200 | -1.85798100 | -0.96027800 |
| O | 6.83588800  | -2.76328400 | -2.35694500 |
| O | 9.26133600  | -3.46293600 | -2.32385900 |
| C | 5.80531800  | -0.29739300 | -0.99915100 |
| O | 5.51038200  | 0.77385400  | -0.37741900 |
| N | 4.87203600  | -1.04613900 | -1.66753200 |
| H | 5.16609000  | -1.89888700 | -2.13270900 |
| C | 3.45240400  | -0.62629400 | -1.69651100 |
| H | 3.42329600  | 0.45812400  | -1.86136800 |
| H | 2.98078800  | -1.11936200 | -2.55572000 |
| C | -0.79677000 | -2.22321600 | 2.34523100  |
| C | -2.18041300 | -2.30999800 | 2.49057000  |
| C | -2.72179900 | -2.73641700 | 3.74826700  |
| C | -1.90666600 | -3.08323200 | 4.82460900  |
| C | -0.46924200 | -3.02001100 | 4.70455400  |
| N | -0.01571600 | -2.57516400 | 3.42690100  |
| H | -3.80246000 | -2.79516900 | 3.85426600  |
| H | -2.83054900 | -2.05968100 | 1.66031700  |
| H | -2.30707900 | -3.41425100 | 5.77646500  |
| O | 1.41152400  | -2.51450400 | 3.30781100  |
| O | 0.44965500  | -3.30407600 | 5.55985200  |
| C | -0.13294200 | -1.88553600 | 1.01222500  |
| O | -0.25915000 | -2.70731600 | 0.05163900  |
| N | 0.53721200  | -0.68410900 | 0.88595500  |
| C | 1.24918600  | -0.43154300 | -0.40310900 |
| H | 0.67402600  | -0.91292600 | -1.20065600 |
| H | 1.25194500  | 0.65112700  | -0.58071900 |
| C | -5.85367100 | -1.97899200 | -1.51177100 |
| C | -5.26993400 | -3.24078000 | -1.63189000 |



|   |             |             |             |
|---|-------------|-------------|-------------|
| C | -5.71677200 | -4.14696900 | -2.64631700 |
| C | -6.73467500 | -3.80369700 | -3.53231400 |
| C | -7.36911100 | -2.50957200 | -3.44885300 |
| N | -6.86192100 | -1.66863900 | -2.41261000 |
| H | -5.24490600 | -5.12311300 | -2.72251800 |
| H | -4.47513000 | -3.49108300 | -0.94037000 |
| H | -7.08659100 | -4.47568900 | -4.30689900 |
| O | -7.52758700 | -0.39850600 | -2.37746500 |
| O | -8.31384400 | -2.00323100 | -4.16091500 |
| C | -5.35236200 | -1.03239200 | -0.42885600 |
| O | -4.47753800 | -1.45800800 | 0.39137900  |
| N | -5.84202300 | 0.24487300  | -0.37893300 |
| H | -6.55091300 | 0.52599000  | -1.04932900 |
| C | -5.34110200 | 1.19876300  | 0.63809800  |
| H | -5.27027600 | 0.66625600  | 1.59488100  |
| H | -6.08650900 | 1.99595200  | 0.74238300  |
| C | 2.70268400  | -0.97559600 | -0.38193900 |
| H | 3.25180300  | -0.53556900 | 0.45973800  |
| H | 2.68101900  | -2.06294200 | -0.23841500 |
| C | 0.69400500  | 0.31109400  | 1.98905600  |
| H | 0.91282300  | -0.21179500 | 2.92439100  |
| H | 1.58585900  | 0.90471300  | 1.75283000  |
| C | -0.53356400 | 1.24694800  | 2.18448700  |
| H | -0.32412600 | 1.90762200  | 3.03903400  |
| H | -1.40248200 | 0.63483500  | 2.45440100  |
| C | -3.31196200 | 2.52436900  | 1.46699400  |
| H | -3.93056700 | 3.37291300  | 1.77140500  |
| H | -3.22287000 | 1.84328900  | 2.32279300  |
| C | -3.94988300 | 1.78188500  | 0.26277700  |
| H | -3.30775000 | 0.95009000  | -0.05018800 |
| H | -4.04368000 | 2.46955800  | -0.58767100 |
| H | 1.68348800  | -2.87274600 | 4.21111300  |
| H | -0.23719800 | 3.94727000  | -2.46619400 |
| H | -8.17878800 | -0.51851800 | -3.14635100 |
| H | 7.49244700  | -3.46959300 | -2.67192500 |

DFOH<sub>2</sub>

|   |             |             |             |
|---|-------------|-------------|-------------|
| N | -0.75175200 | 2.00718300  | -1.81725700 |
| C | 0.02321200  | 3.22952100  | -2.25505600 |
| C | 0.41235100  | 4.11088700  | -1.03877900 |
| C | 1.58064800  | 3.49536200  | -0.20417600 |
| C | 1.50597100  | 3.83320900  | 1.30841100  |
| C | 2.56836300  | 3.09307000  | 2.16836200  |
| N | 2.47273700  | 1.61862500  | 2.02121400  |
| C | 3.47046100  | 0.70831100  | 1.75973400  |
| C | 4.91149200  | 1.26779800  | 1.65211700  |
| C | 6.00974500  | 0.16294200  | 1.63288800  |
| C | 6.28800100  | -0.45776900 | 0.24757700  |
| O | 7.37457300  | -0.21895200 | -0.37484700 |
| N | 5.31316200  | -1.28240700 | -0.25740100 |
| C | 5.47288900  | -1.97037800 | -1.56027300 |
| C | 4.31775300  | -2.97558100 | -1.78926200 |
| C | 2.95073800  | -2.29310000 | -2.08197400 |
| C | 1.74983300  | -3.24289900 | -1.83162900 |
| C | 0.35918200  | -2.59330400 | -2.08411100 |
| N | 0.24166600  | -1.20210200 | -1.54689300 |
| C | 0.13921100  | -0.87588800 | -0.25113700 |
| C | 0.09692500  | -1.93765000 | 0.85176300  |
| C | -1.05522700 | -1.67495900 | 1.87010600  |
| C | -2.43501200 | -2.01913500 | 1.30379800  |
| O | -2.80622200 | -1.65805000 | 0.13631500  |
| N | -3.27149800 | -2.76024900 | 2.10708700  |
| C | -4.60929500 | -3.24727900 | 1.67774200  |
| C | -5.78956500 | -2.30466500 | 2.04926800  |
| C | -5.81694700 | -0.94275100 | 1.29829600  |
| C | -6.04327000 | -1.07754400 | -0.23070600 |
| C | -6.00647300 | 0.27282100  | -0.98940400 |
| N | -4.67311900 | 0.93609500  | -0.91512700 |
| C | -4.44689000 | 2.29976900  | -0.80641000 |
| C | -5.59057800 | 3.16408800  | -0.25837700 |
| O | 1.16401500  | 1.11640900  | 2.34130600  |
| O | 3.22560300  | -0.53966400 | 1.61776000  |
| O | 0.37162900  | -0.22709600 | -2.56180300 |
| O | 0.09807900  | 0.38795500  | 0.15196400  |
| O | -3.64840700 | 0.19821200  | -1.62100300 |
| O | -3.33544000 | 2.83624600  | -1.11200600 |
| H | -0.42711100 | 1.63761300  | -0.89102500 |
| H | -1.76842500 | 2.19016400  | -1.74567000 |
| H | -0.50678800 | 1.13142100  | -2.38355300 |
| H | -0.59912600 | 3.78561800  | -2.96554400 |
| H | 0.91807700  | 2.87831000  | -2.78234300 |
| H | 0.68682900  | 5.11379200  | -1.39746400 |
| H | -0.48103400 | 4.24005600  | -0.40879200 |
| H | 2.54306900  | 3.83525600  | -0.62006500 |
| H | 1.56822100  | 2.40368700  | -0.31380400 |
| H | 0.51141600  | 3.56800000  | 1.68948400  |
| H | 1.63670300  | 4.91461200  | 1.47318600  |
| H | 2.42599400  | 3.34888600  | 3.22907400  |
| H | 3.57582800  | 3.40268800  | 1.87356200  |
| H | 4.99937800  | 1.89960900  | 0.75612500  |
| H | 5.09691100  | 1.92095000  | 2.51571800  |

|   |             |             |             |
|---|-------------|-------------|-------------|
| H | 5.74028300  | -0.62535200 | 2.34680600  |
| H | 6.95792600  | 0.60886800  | 1.94900900  |
| H | 4.45271800  | -1.37325300 | 0.28480700  |
| H | 5.50692300  | -1.22762300 | -2.37214600 |
| H | 6.44493200  | -2.48145300 | -1.56404300 |
| H | 4.58962500  | -3.63826200 | -2.62477900 |
| H | 4.23315400  | -3.61860500 | -0.89746500 |
| H | 2.92887300  | -1.92072700 | -3.11592500 |
| H | 2.83255200  | -1.40709200 | -1.44519500 |
| H | 1.82378800  | -4.13144100 | -2.48009600 |
| H | 1.80858000  | -3.61175300 | -0.79565600 |
| H | -0.44507400 | -3.22211300 | -1.67858800 |
| H | 0.18287900  | -2.46086100 | -3.15351600 |
| H | 0.01886500  | -2.95181500 | 0.45063400  |
| H | 1.04898000  | -1.85540500 | 1.39558000  |
| H | -1.04565300 | -0.61170400 | 2.13917700  |
| H | -0.86642900 | -2.24713400 | 2.78805700  |
| H | -2.93722100 | -3.02521200 | 3.02611800  |
| H | -4.56365600 | -3.40410900 | 0.59541600  |
| H | -4.76363300 | -4.22602100 | 2.15104400  |
| H | -6.72372300 | -2.85407900 | 1.84563800  |
| H | -5.76632200 | -2.12057600 | 3.13459900  |
| H | -4.87837000 | -0.40237700 | 1.48047900  |
| H | -6.62231100 | -0.32751000 | 1.73271900  |
| H | -5.28646400 | -1.73695800 | -0.66886300 |
| H | -7.02589500 | -1.53645900 | -0.42565100 |
| H | -6.75016600 | 0.96142600  | -0.57579900 |
| H | -6.23970300 | 0.10899900  | -2.05193100 |
| H | -6.39002400 | 3.27974200  | -1.00233400 |
| H | -6.02712000 | 2.74734100  | 0.65617000  |
| H | -5.17239800 | 4.14891700  | -0.04196900 |
| H | 0.73540600  | 0.79107500  | 1.44886300  |
| H | -3.23137000 | -0.42887800 | -0.95549300 |

Cartesian coordinates of optimized structures (CPCM, water)

Zr[3,4,3-(LI-1,2-HOPO)], I, CPCM

|   |             |             |             |
|---|-------------|-------------|-------------|
| C | -1.11977300 | 1.68752700  | -2.92473200 |
| C | -0.54350100 | 2.10061100  | -4.13392300 |
| C | 0.46292500  | 1.30306000  | -4.74769100 |
| C | 0.86883700  | 0.08875700  | -4.17484000 |
| C | 0.28220700  | -0.33139200 | -2.94805000 |
| N | -0.67476900 | 0.50305800  | -2.37379700 |
| H | 0.91371800  | 1.63648500  | -5.67753700 |
| H | -0.88782100 | 3.01873500  | -4.59398600 |
| H | 1.62152900  | -0.54287500 | -4.63198700 |
| O | -1.22269400 | 0.01694800  | -1.17526300 |
| O | 0.54884600  | -1.43101900 | -2.25910400 |
| C | -2.34416500 | 2.41534800  | -2.36902000 |
| O | -3.31691400 | 2.57314100  | -3.20204000 |
| N | -2.39029400 | 2.91150700  | -1.10131800 |
| C | -1.28229900 | 2.84992900  | -0.09819400 |
| H | -1.74809000 | 2.57264100  | 0.85281700  |
| H | -0.60697700 | 2.03927400  | -0.35863500 |
| C | 4.30599000  | -1.40039000 | -1.07411800 |
| C | 5.16545100  | -2.39192400 | -1.56773400 |
| C | 4.72732000  | -3.74112500 | -1.65895700 |
| C | 3.42961300  | -4.09517300 | -1.26765500 |
| C | 2.55093000  | -3.09092400 | -0.77146400 |
| N | 3.03354300  | -1.78808300 | -0.67827000 |
| H | 5.40253500  | -4.49931800 | -2.04321000 |
| H | 6.15775400  | -2.09483000 | -1.88093300 |
| H | 3.06062100  | -5.11196500 | -1.33612000 |
| O | 2.12410300  | -0.88143300 | -0.10246200 |
| O | 1.29816700  | -3.27462300 | -0.37806700 |
| C | 4.78889500  | 0.04454200  | -1.02468600 |
| O | 6.00862200  | 0.28791800  | -1.36479400 |
| N | 3.92637700  | 1.02436300  | -0.65698000 |
| H | 2.99517800  | 0.73737400  | -0.35193800 |
| C | 4.34596400  | 2.44993100  | -0.62420300 |
| H | 5.13137200  | 2.57820100  | 0.13210700  |
| H | 4.79635000  | 2.68252200  | -1.59764100 |
| C | 1.73472900  | 0.75944800  | 3.20579600  |
| C | 2.07466000  | 0.45123000  | 4.52894000  |
| C | 1.62424400  | -0.76617000 | 5.11299300  |
| C | 0.93392500  | -1.70920000 | 4.34014000  |
| C | 0.62140700  | -1.40716600 | 2.98370700  |
| N | 0.91808000  | -0.12355900 | 2.51923700  |
| H | 1.86774600  | -0.98801400 | 6.14761500  |
| H | 2.72780600  | 1.12330000  | 5.07297400  |
| H | 0.65019900  | -2.68070200 | 4.72843600  |
| O | 0.34671200  | 0.20951200  | 1.27194500  |
| O | 0.08514500  | -2.22257800 | 2.09271100  |
| C | 2.53428600  | 1.80759700  | 2.43333600  |
| O | 3.79456700  | 1.56130000  | 2.35706000  |
| N | 1.95923300  | 2.90745500  | 1.87306400  |
| C | 2.86671500  | 3.83364800  | 1.11713900  |
| H | 2.38824200  | 4.81323000  | 1.11469200  |
| H | 3.80651900  | 3.92412700  | 1.67466000  |

|    |             |             |             |
|----|-------------|-------------|-------------|
| C  | -4.51496700 | -1.80233700 | 0.60774500  |
| C  | -5.41342900 | -2.84881100 | 0.35331500  |
| C  | -4.93765100 | -4.12335300 | -0.05300100 |
| C  | -3.56526500 | -4.33809800 | -0.23879800 |
| C  | -2.65442000 | -3.27582100 | 0.01034600  |
| N  | -3.15744700 | -2.06461900 | 0.47697800  |
| H  | -5.64349500 | -4.92579000 | -0.24261300 |
| H  | -6.47112700 | -2.64308700 | 0.45297600  |
| H  | -3.16665000 | -5.28614500 | -0.58064200 |
| O  | -2.17443000 | -1.12413000 | 0.82671700  |
| O  | -1.33834500 | -3.32071200 | -0.17386600 |
| C  | -5.06652300 | -0.41701700 | 0.91751100  |
| O  | -6.33958900 | -0.29432700 | 1.06514200  |
| N  | -4.20596600 | 0.63502900  | 0.96388400  |
| H  | -3.21088700 | 0.42367800  | 0.86983100  |
| C  | -4.67769100 | 2.03303100  | 1.11617700  |
| H  | -3.98131600 | 2.55312600  | 1.78354400  |
| H  | -5.65026400 | 1.99242700  | 1.61317200  |
| C  | 3.16902300  | 3.42968100  | -0.36085600 |
| H  | 2.25589100  | 3.05530400  | -0.84140000 |
| H  | 3.42612400  | 4.36605500  | -0.87439300 |
| C  | 0.58833800  | 3.34229500  | 2.34341900  |
| H  | -0.04413800 | 2.45026700  | 2.35432000  |
| H  | 0.68976300  | 3.69012900  | 3.38082000  |
| C  | -0.11177400 | 4.47044900  | 1.54368400  |
| H  | 0.47456200  | 5.39700000  | 1.59469100  |
| H  | -1.03329300 | 4.66954800  | 2.11225900  |
| C  | -0.51025300 | 4.19187300  | 0.06567600  |
| H  | 0.36849500  | 4.19188700  | -0.58962100 |
| H  | -1.14261600 | 5.02740200  | -0.26311100 |
| C  | -3.62057300 | 3.66720000  | -0.68855200 |
| H  | -3.93379100 | 4.28620000  | -1.53564200 |
| H  | -3.32221500 | 4.33483600  | 0.12597500  |
| C  | -4.83051800 | 2.80264400  | -0.23589500 |
| H  | -5.11308300 | 2.09931700  | -1.02864100 |
| H  | -5.66817900 | 3.50636100  | -0.12318100 |
| Zr | -0.06953100 | -1.52930400 | -0.06471100 |

Zr[3,3,3-(LI-1,2-HOPO)], **II**, CPCM

|   |             |             |             |
|---|-------------|-------------|-------------|
| C | -0.79686800 | 1.79162900  | -2.83027500 |
| C | -0.14014800 | 2.18645500  | -4.00420400 |
| C | 0.81158800  | 1.31922000  | -4.61011400 |
| C | 1.08829200  | 0.05785900  | -4.06200900 |
| C | 0.42378100  | -0.34267300 | -2.86906300 |
| N | -0.48664500 | 0.55189100  | -2.30797600 |
| H | 1.32387000  | 1.63778000  | -5.51287100 |
| H | -0.38067200 | 3.14702700  | -4.44281800 |
| H | 1.80169700  | -0.62339800 | -4.51095200 |
| O | -1.12634900 | 0.07714400  | -1.15151100 |
| O | 0.58147300  | -1.47335100 | -2.19602500 |
| C | -1.96646800 | 2.61594000  | -2.28951200 |
| O | -2.87077300 | 2.91851300  | -3.15830200 |
| N | -2.03433700 | 3.04358400  | -0.99361400 |
| C | -1.00829000 | 2.72146500  | 0.05132200  |
| C | 4.28015500  | -1.37388700 | -0.87970800 |
| C | 5.17773800  | -2.36255700 | -1.30567800 |
| C | 4.76975500  | -3.72346400 | -1.36128100 |
| C | 3.46375000  | -4.09251100 | -1.01165600 |
| C | 2.54473900  | -3.09146100 | -0.58682200 |
| N | 3.00554100  | -1.77898200 | -0.51169000 |
| H | 5.47532700  | -4.48028200 | -1.68963500 |
| H | 6.17337600  | -2.05598300 | -1.59865400 |
| H | 3.11993600  | -5.11912700 | -1.06101800 |
| O | 2.07059500  | -0.87204200 | 0.01890300  |
| O | 1.27586700  | -3.28226700 | -0.24591800 |
| C | 4.71619000  | 0.08800900  | -0.88733200 |
| O | 5.93534300  | 0.35325100  | -1.21134700 |
| N | 3.81265300  | 1.05865100  | -0.59872300 |
| H | 2.88251600  | 0.75986600  | -0.30233700 |
| C | 4.17766700  | 2.49773900  | -0.67576100 |
| H | 4.97620300  | 2.70774100  | 0.04862300  |
| H | 4.59841100  | 2.67809100  | -1.67364900 |
| C | 1.48890800  | 0.92885200  | 3.25044700  |
| C | 1.76584000  | 0.68536900  | 4.60180600  |
| C | 1.33263200  | -0.52900100 | 5.20496300  |
| C | 0.72037200  | -1.52938000 | 4.43526600  |
| C | 0.46788100  | -1.29057900 | 3.05479100  |
| N | 0.75018600  | -0.01576100 | 2.55994100  |
| H | 1.52859300  | -0.70327700 | 6.25860400  |
| H | 2.35882000  | 1.40349900  | 5.15586400  |
| H | 0.45417500  | -2.49509200 | 4.84945800  |
| O | 0.24909700  | 0.25250900  | 1.27457600  |
| O | 0.00110400  | -2.15127700 | 2.16272000  |
| C | 2.29895900  | 1.95703700  | 2.45762500  |
| O | 3.56677600  | 1.73508900  | 2.45880800  |
| N | 1.74134800  | 2.99888600  | 1.78044800  |
| C | 2.66859700  | 3.89671000  | 1.01291200  |
| H | 2.19422000  | 4.88166800  | 0.99116500  |
| H | 3.60255200  | 3.98872600  | 1.57785500  |
| C | -4.57876800 | -1.62021900 | 0.40339900  |
| C | -5.51419700 | -2.59906200 | 0.03924000  |
| C | -5.08281700 | -3.86403900 | -0.44191800 |
| C | -3.71612900 | -4.13149100 | -0.59670300 |

|    |             |             |             |
|----|-------------|-------------|-------------|
| C  | -2.76759900 | -3.13605800 | -0.23606200 |
| N  | -3.23049500 | -1.94107100 | 0.30719700  |
| H  | -5.81718600 | -4.61548400 | -0.71402600 |
| H  | -6.56442400 | -2.34786200 | 0.11133100  |
| H  | -3.34853700 | -5.07000300 | -0.99504300 |
| O  | -2.21962700 | -1.08189400 | 0.77740900  |
| O  | -1.44981200 | -3.22837200 | -0.38038800 |
| C  | -5.06974000 | -0.22652400 | 0.77127600  |
| O  | -6.33779300 | -0.04038700 | 0.88876100  |
| N  | -4.15100500 | 0.76856300  | 0.88404900  |
| H  | -3.16914400 | 0.49400500  | 0.81612700  |
| C  | -4.52868700 | 2.19193700  | 1.05031800  |
| H  | -3.83461800 | 2.64262500  | 1.76882400  |
| H  | -5.52993800 | 2.21209400  | 1.48811700  |
| C  | 2.97668000  | 3.45758200  | -0.45206900 |
| H  | 2.07214700  | 3.05075800  | -0.92237800 |
| H  | 3.21919400  | 4.38100200  | -0.99529100 |
| C  | 0.36513500  | 3.52018400  | 2.07413200  |
| H  | -0.17216200 | 2.76082500  | 2.65083300  |
| H  | 0.49080600  | 4.39952500  | 2.72133700  |
| C  | -0.47551700 | 3.94241300  | 0.83882800  |
| C  | -3.25600200 | 3.82666900  | -0.60421800 |
| H  | -3.48111100 | 4.50655400  | -1.43169800 |
| H  | -2.99670000 | 4.43317300  | 0.26515700  |
| C  | -4.53441300 | 2.99871200  | -0.28931000 |
| H  | -4.77164400 | 2.32582700  | -1.12249200 |
| H  | -5.35172500 | 3.73221100  | -0.23251900 |
| Zr | -0.09754700 | -1.52700200 | -0.01249400 |
| H  | 0.09390400  | 4.60905900  | 0.17968700  |
| H  | -1.30190000 | 4.53469800  | 1.24892000  |
| H  | -0.17716300 | 2.21574100  | -0.43438600 |
| H  | -1.44297200 | 2.00717800  | 0.75293800  |

[ZrDFO(H<sub>2</sub>O)<sub>2</sub>]<sup>2+</sup> with non hydrogen bonded amine group, **III**, CPCM

|    |             |             |             |
|----|-------------|-------------|-------------|
| Zr | 0.29537800  | -0.31543800 | 1.16681300  |
| N  | -8.15471000 | -5.01405300 | -1.65216500 |
| C  | -7.38446300 | -3.76034900 | -2.08030900 |
| C  | -6.32197900 | -3.37389400 | -1.03226200 |
| C  | -5.55838200 | -2.09129800 | -1.45883600 |
| C  | -4.48329500 | -1.68000800 | -0.41826700 |
| C  | -3.74740700 | -0.38893000 | -0.85561600 |
| N  | -2.63834700 | -0.02408000 | 0.06624700  |
| C  | -2.60973300 | 0.85526000  | 1.07405700  |
| C  | -3.82720200 | 1.64161300  | 1.53519700  |
| C  | -3.56264100 | 3.16056300  | 1.69805700  |
| C  | -3.34975400 | 3.87892700  | 0.35503700  |
| O  | -3.89548400 | 3.44932900  | -0.72906300 |
| N  | -2.57099500 | 4.99991100  | 0.39181700  |
| C  | -2.19489200 | 5.80238700  | -0.79983700 |
| C  | -0.68719500 | 5.66224200  | -1.14489200 |
| C  | -0.25908900 | 4.20137500  | -1.43869100 |
| C  | 1.24844600  | 4.07316600  | -1.77308200 |
| C  | 1.72777200  | 2.61235300  | -1.97520500 |
| N  | 1.65363100  | 1.78057300  | -0.73604100 |
| C  | 2.53827200  | 1.66199900  | 0.25869500  |
| C  | 3.85751800  | 2.41520800  | 0.29847500  |
| C  | 5.09412200  | 1.47186400  | 0.24960400  |
| C  | 5.18681300  | 0.69607300  | -1.07490600 |
| O  | 4.78711300  | 1.21290900  | -2.18431700 |
| N  | 5.70441900  | -0.56277500 | -1.01173500 |
| C  | 5.80577300  | -1.46962600 | -2.18529300 |
| C  | 5.91042200  | -2.94927600 | -1.73489000 |
| C  | 4.74208600  | -3.45664600 | -0.84237900 |
| C  | 3.35880400  | -3.49344900 | -1.54356900 |
| C  | 2.21144700  | -3.96268400 | -0.60877100 |
| N  | 1.81843500  | -2.92784100 | 0.38986900  |
| C  | 2.15011500  | -2.77761400 | 1.68053900  |
| C  | 3.00813400  | -3.75429400 | 2.45317500  |
| O  | -1.44636900 | -0.78813500 | -0.12727100 |
| O  | -1.45959700 | 0.97267100  | 1.72124300  |
| O  | 0.47362300  | 0.99178200  | -0.58195100 |
| O  | 2.20836200  | 0.83461900  | 1.23962200  |
| O  | 0.98482200  | -1.89759700 | -0.14750300 |
| O  | 1.67012100  | -1.70958700 | 2.29452100  |
| H  | -8.88112500 | -5.24501300 | -2.33645900 |
| H  | -7.52977400 | -5.82230300 | -1.57151400 |
| H  | -8.61031000 | -4.87376400 | -0.74509400 |
| H  | -8.13062900 | -2.97152600 | -2.20919500 |
| H  | -6.93446500 | -3.99063000 | -3.04969700 |
| H  | -6.80839800 | -3.20643900 | -0.06016700 |
| H  | -5.61040300 | -4.20295500 | -0.90598500 |
| H  | -6.27541300 | -1.26648400 | -1.59199400 |
| H  | -5.07820000 | -2.25894800 | -2.43509600 |
| H  | -3.75239600 | -2.49170800 | -0.29902500 |
| H  | -4.95505500 | -1.51349400 | 0.56071400  |
| H  | -4.43835200 | 0.45573500  | -0.91665500 |
| H  | -3.28564100 | -0.52062300 | -1.83976600 |
| H  | -4.66996200 | 1.47630500  | 0.86334900  |



|   |             |             |             |
|---|-------------|-------------|-------------|
| H | -4.10558800 | 1.23561600  | 2.51728900  |
| H | -2.70843200 | 3.33616700  | 2.36024100  |
| H | -4.44304800 | 3.60531200  | 2.18204500  |
| H | -2.15708700 | 5.26621900  | 1.27935300  |
| H | -2.81399400 | 5.45912300  | -1.63367800 |
| H | -2.43842400 | 6.85409800  | -0.60240900 |
| H | -0.48282000 | 6.30028000  | -2.01857000 |
| H | -0.08684700 | 6.06106500  | -0.31177600 |
| H | -0.85319400 | 3.80460600  | -2.27727600 |
| H | -0.48867900 | 3.57750400  | -0.56453100 |
| H | 1.47123000  | 4.61323400  | -2.70602900 |
| H | 1.84843600  | 4.54674300  | -0.98186900 |
| H | 2.76187500  | 2.57832600  | -2.32836200 |
| H | 1.10091400  | 2.09420800  | -2.70726200 |
| H | 3.91014700  | 3.13909300  | -0.51549600 |
| H | 3.88535300  | 2.97199400  | 1.24300100  |
| H | 5.08456800  | 0.77811300  | 1.09689700  |
| H | 5.99431000  | 2.09363500  | 0.34744300  |
| H | 6.03881600  | -0.90403000 | -0.11724700 |
| H | 4.92343900  | -1.30317600 | -2.81300900 |
| H | 6.68690600  | -1.20488400 | -2.78710100 |
| H | 5.98226400  | -3.56637800 | -2.64244500 |
| H | 6.85506000  | -3.08535000 | -1.18613800 |
| H | 4.68023000  | -2.83360900 | 0.06141700  |
| H | 4.98969900  | -4.47270200 | -0.49920600 |
| H | 3.09779600  | -2.50981200 | -1.95587500 |
| H | 3.39366200  | -4.19500100 | -2.39027700 |
| H | 2.49133100  | -4.87149900 | -0.06863600 |
| H | 1.30533900  | -4.17426600 | -1.18470900 |
| H | 3.90341100  | -3.23298900 | 2.81064700  |
| H | 2.44508100  | -4.09484900 | 3.32929000  |
| H | 3.31412500  | -4.61802800 | 1.86318500  |
| O | -1.04210300 | -1.89677400 | 2.25505600  |
| H | -1.79404300 | -2.30502300 | 1.78753600  |
| H | -0.75630000 | -2.42380800 | 3.02378600  |
| O | 0.40828600  | 0.33028200  | 3.33421000  |
| H | 1.08472600  | 0.04595400  | 3.97408600  |
| H | -0.29463000 | 0.87558800  | 3.73122600  |

[ZrDFO(H<sub>2</sub>O)<sub>2</sub>]<sup>2+</sup> with hydrogen bonded amine group, **IIIa**, CPCM

|    |             |             |             |
|----|-------------|-------------|-------------|
| Zr | 0.09593700  | -0.90110900 | -1.06389700 |
| N  | -1.23474300 | 0.18668800  | 2.32465400  |
| C  | -1.05209400 | 0.02372800  | 3.82895800  |
| C  | -0.39117200 | -1.33147000 | 4.16965400  |
| C  | 1.07274400  | -1.48431600 | 3.64369200  |
| C  | 1.40367100  | -2.93651300 | 3.18761500  |
| C  | 2.51062700  | -3.02668400 | 2.11129800  |
| N  | 2.14088800  | -2.27480500 | 0.86456500  |
| C  | 2.94319600  | -1.85243800 | -0.12427500 |
| C  | 4.43563100  | -2.15918900 | -0.13330800 |
| C  | 5.29107600  | -1.16062500 | -0.94775300 |
| C  | 5.54115500  | 0.16232700  | -0.20353300 |
| O  | 5.64298200  | 0.19610400  | 1.07932400  |
| N  | 5.68305300  | 1.27741700  | -0.97993000 |
| C  | 5.91353300  | 2.64446000  | -0.44456700 |
| C  | 4.62748600  | 3.51744700  | -0.45993900 |
| C  | 3.45376800  | 2.87046300  | 0.31717300  |
| C  | 2.19046600  | 3.76378700  | 0.39723800  |
| C  | 0.97960300  | 3.03699400  | 1.03821700  |
| N  | 0.36472900  | 2.01353500  | 0.14449800  |
| C  | -0.65286500 | 2.13705200  | -0.71725600 |
| C  | -1.36834900 | 3.45542500  | -0.96233000 |
| C  | -2.90634700 | 3.29020500  | -1.01857600 |
| C  | -3.51517700 | 2.69444700  | 0.26354000  |
| O  | -2.78294200 | 2.32005400  | 1.25498100  |
| N  | -4.86971400 | 2.56645500  | 0.26643100  |
| C  | -5.65543500 | 1.84928400  | 1.30311300  |
| C  | -6.51113400 | 0.71491100  | 0.67344100  |
| C  | -5.70246900 | -0.35562400 | -0.11034000 |
| C  | -4.80863500 | -1.25661900 | 0.78257500  |
| C  | -4.03089200 | -2.34208200 | -0.00664400 |
| N  | -2.88184700 | -1.81054300 | -0.79347000 |
| C  | -2.73986600 | -1.68891800 | -2.12193500 |
| C  | -3.86073200 | -1.99669600 | -3.09336800 |
| O  | 0.74471800  | -2.12284800 | 0.60540400  |
| O  | 2.35645600  | -1.24031100 | -1.13743800 |
| O  | 0.87187000  | 0.67988700  | 0.27861400  |
| O  | -1.01425400 | 1.04848400  | -1.37111100 |
| O  | -1.70240800 | -1.54342500 | -0.03037900 |
| O  | -1.55489100 | -1.30782900 | -2.56231500 |
| H  | -0.33200500 | 0.29000900  | 1.83250200  |
| H  | -1.68779800 | -0.63109300 | 1.89286200  |
| H  | -1.81141600 | 1.01440400  | 2.08203000  |
| H  | -2.04658700 | 0.09598300  | 4.27835500  |
| H  | -0.44947800 | 0.87242700  | 4.16750500  |
| H  | -0.42222800 | -1.44906600 | 5.26115400  |
| H  | -1.02229100 | -2.13153900 | 3.75427200  |
| H  | 1.78188400  | -1.16350800 | 4.42017700  |
| H  | 1.23044900  | -0.81293300 | 2.79134100  |
| H  | 0.49877200  | -3.41436800 | 2.79581200  |
| H  | 1.74119800  | -3.54392100 | 4.03925500  |
| H  | 2.68990800  | -4.07582800 | 1.84313400  |
| H  | 3.44686700  | -2.59722200 | 2.48271400  |
| H  | 4.81387300  | -2.22299800 | 0.88977200  |

|   |             |             |             |
|---|-------------|-------------|-------------|
| H | 4.54565800  | -3.16007000 | -0.57562100 |
| H | 4.84456600  | -0.97162500 | -1.92848400 |
| H | 6.27141900  | -1.62531000 | -1.12215200 |
| H | 5.56151700  | 1.18299700  | -1.98273000 |
| H | 6.28573500  | 2.53662300  | 0.57879700  |
| H | 6.69811200  | 3.11777900  | -1.04737800 |
| H | 4.88318700  | 4.49493100  | -0.02214900 |
| H | 4.32346400  | 3.70310200  | -1.50217100 |
| H | 3.78095700  | 2.62876000  | 1.34062100  |
| H | 3.19097200  | 1.91936500  | -0.16240500 |
| H | 2.40174100  | 4.65383000  | 1.00884100  |
| H | 1.90621700  | 4.12330500  | -0.60281500 |
| H | 0.19960700  | 3.75056300  | 1.31714200  |
| H | 1.28116400  | 2.49978900  | 1.94297200  |
| H | -1.09004700 | 4.19024700  | -0.20493000 |
| H | -1.03074700 | 3.84663100  | -1.93151800 |
| H | -3.18877800 | 2.64531200  | -1.85937600 |
| H | -3.35865100 | 4.27167100  | -1.20759700 |
| H | -5.37598100 | 2.90149700  | -0.54754600 |
| H | -4.94641900 | 1.45876600  | 2.03749600  |
| H | -6.31287200 | 2.56327000  | 1.81642100  |
| H | -7.08084200 | 0.23694600  | 1.48503400  |
| H | -7.24987000 | 1.16960600  | -0.00435100 |
| H | -5.08436100 | 0.14297500  | -0.87115600 |
| H | -6.41315900 | -0.99620300 | -0.65478100 |
| H | -4.09590400 | -0.65426800 | 1.36008600  |
| H | -5.43956500 | -1.78641200 | 1.51201100  |
| H | -4.69289100 | -2.86822200 | -0.70149700 |
| H | -3.60191800 | -3.08064600 | 0.67910400  |
| H | -3.56684900 | -1.64017000 | -4.08233000 |
| H | -4.03192400 | -3.07936100 | -3.14399000 |
| H | -4.79631500 | -1.51562100 | -2.79713100 |
| O | 0.48348200  | -2.87358900 | -2.23591000 |
| H | -0.11465900 | -3.13169500 | -2.96146600 |
| O | 0.94682300  | -0.10890200 | -3.00379200 |
| H | 1.87673400  | -0.27168400 | -3.24683400 |
| H | 1.32648900  | -3.36155600 | -2.26200800 |
| H | 0.46760200  | 0.41052000  | -3.67354700 |

ZrDFO(OH)<sub>2</sub>, IV, CPCM

|    |             |             |             |
|----|-------------|-------------|-------------|
| Zr | -0.19003800 | -0.46726400 | 1.46791600  |
| N  | 1.15924900  | -0.65663700 | -2.01812900 |
| C  | 1.28625000  | -1.49762200 | -3.28188000 |
| C  | 1.17770100  | -3.03804200 | -3.06642700 |
| C  | -0.18405400 | -3.74692800 | -3.37789200 |
| C  | -1.19014800 | -3.94678500 | -2.20241500 |
| C  | -2.08922800 | -2.71084300 | -1.89069400 |
| N  | -1.95581400 | -2.23114500 | -0.48876300 |
| C  | -2.89358500 | -1.79178400 | 0.37439300  |
| C  | -4.35426400 | -2.23342500 | 0.26642700  |
| C  | -5.36571300 | -1.26177800 | 0.92457400  |
| C  | -5.68593200 | -0.04272100 | 0.04524500  |
| O  | -5.87599400 | -0.17492600 | -1.22205400 |
| N  | -5.79307300 | 1.16223000  | 0.68003300  |
| C  | -6.08387400 | 2.44538800  | -0.01057100 |
| C  | -4.81850300 | 3.32867800  | -0.19833000 |
| C  | -3.66928500 | 2.59064700  | -0.93007600 |
| C  | -2.45196800 | 3.49484600  | -1.25240400 |
| C  | -1.22151900 | 2.69175700  | -1.75628300 |
| N  | -0.52168800 | 1.95361700  | -0.66988600 |
| C  | 0.54068900  | 2.33081200  | 0.05586600  |
| C  | 1.24393200  | 3.66499400  | -0.16098100 |
| C  | 2.78433800  | 3.53207600  | -0.11120500 |
| C  | 3.36396800  | 2.55110900  | -1.14696100 |
| O  | 2.61648900  | 1.85783900  | -1.93417000 |
| N  | 4.72241900  | 2.44783900  | -1.15022500 |
| C  | 5.50210700  | 1.43143200  | -1.90053200 |
| C  | 6.43668900  | 0.63389300  | -0.94844400 |
| C  | 5.70950700  | -0.10291400 | 0.21103800  |
| C  | 4.83429200  | -1.29971000 | -0.24616100 |
| C  | 4.10626400  | -2.01688300 | 0.92131400  |
| N  | 2.93699400  | -1.26450200 | 1.45387500  |
| C  | 2.77970300  | -0.69394400 | 2.66238500  |
| C  | 3.92024700  | -0.62282300 | 3.66382400  |
| O  | -0.60865400 | -1.95796100 | -0.11767200 |
| O  | -2.47987000 | -1.06355800 | 1.38694200  |
| O  | -0.99782600 | 0.63161700  | -0.40299600 |
| O  | 0.97096800  | 1.49858600  | 0.98154500  |
| O  | 1.76495700  | -1.32670100 | 0.63803900  |
| O  | 1.59485500  | -0.21635500 | 2.96869700  |
| H  | 0.18606400  | -0.51653900 | -1.70303600 |
| H  | 1.62911900  | -1.08557400 | -1.19547300 |
| H  | 1.59356000  | 0.27316400  | -2.14646600 |
| H  | 2.27334100  | -1.25921400 | -3.68907200 |
| H  | 0.53280600  | -1.13518600 | -3.98848400 |
| H  | 1.92285800  | -3.47813900 | -3.74367800 |
| H  | 1.50969700  | -3.29440400 | -2.04999200 |
| H  | 0.06390600  | -4.74947200 | -3.75682300 |
| H  | -0.68589500 | -3.22600400 | -4.20941400 |
| H  | -0.64034400 | -4.23174300 | -1.29716900 |
| H  | -1.84421100 | -4.79263900 | -2.45456900 |
| H  | -3.14242100 | -2.93598500 | -2.07124100 |
| H  | -1.81445100 | -1.86573200 | -2.53655100 |
| H  | -4.63499900 | -2.40512300 | -0.77531500 |

|   |             |             |             |
|---|-------------|-------------|-------------|
| H | -4.42294800 | -3.20422400 | 0.77801000  |
| H | -5.01589400 | -0.94915500 | 1.91268300  |
| H | -6.30827100 | -1.80800800 | 1.06803600  |
| H | -5.59856300 | 1.19876200  | 1.67477100  |
| H | -6.52107200 | 2.19926100  | -0.98301800 |
| H | -6.83641100 | 2.98504500  | 0.57743700  |
| H | -5.12079300 | 4.22405300  | -0.76400300 |
| H | -4.46462200 | 3.67658200  | 0.78496200  |
| H | -4.04880400 | 2.16104300  | -1.87051900 |
| H | -3.33358800 | 1.74880100  | -0.31261400 |
| H | -2.72431800 | 4.22036300  | -2.03400300 |
| H | -2.15742600 | 4.07638100  | -0.36590400 |
| H | -0.50149100 | 3.35619100  | -2.24121900 |
| H | -1.52452900 | 1.93612000  | -2.48930700 |
| H | 0.93393200  | 4.11993300  | -1.10375300 |
| H | 0.93589200  | 4.34846900  | 0.64219900  |
| H | 3.10307100  | 3.19680200  | 0.88324800  |
| H | 3.23107200  | 4.52215600  | -0.26864800 |
| H | 5.23927000  | 3.04294400  | -0.51021500 |
| H | 4.78677800  | 0.77645700  | -2.40424900 |
| H | 6.10310700  | 1.92925800  | -2.67325900 |
| H | 7.00067100  | -0.08755500 | -1.55931400 |
| H | 7.17533300  | 1.32991400  | -0.52138700 |
| H | 5.09115800  | 0.61734100  | 0.76674900  |
| H | 6.46858700  | -0.47317800 | 0.91736300  |
| H | 4.09152800  | -0.98130600 | -0.98896500 |
| H | 5.47242600  | -2.04930600 | -0.73830200 |
| H | 4.79695600  | -2.20371700 | 1.74961400  |
| H | 3.71197800  | -2.98309700 | 0.58508700  |
| H | 3.63707300  | 0.07138100  | 4.45788100  |
| H | 4.09938300  | -1.61023100 | 4.10867300  |
| H | 4.85075700  | -0.28190600 | 3.20196000  |
| O | -0.33366200 | -2.11374700 | 2.80329500  |
| H | 0.29281000  | -2.14752400 | 3.55369100  |
| O | -1.11186900 | 0.83771800  | 2.82302700  |
| H | -2.00801400 | 0.63861200  | 3.15853200  |

3,4,3-(LI-1,2-HOPO)H<sub>4</sub>, CPCM

|   |             |             |             |
|---|-------------|-------------|-------------|
| C | -1.63787300 | -3.85791800 | -0.60821300 |
| C | -0.36246600 | -4.17890200 | -1.06558700 |
| C | 0.40445300  | -5.16251800 | -0.36156800 |
| C | -0.10086600 | -5.80530400 | 0.76908400  |
| C | -1.41805600 | -5.49385700 | 1.26250300  |
| N | -2.10981000 | -4.51800900 | 0.50727600  |
| H | 1.40029500  | -5.40942700 | -0.71834300 |
| H | 0.02856700  | -3.68341800 | -1.94577200 |
| H | 0.47201000  | -6.55004100 | 1.31038600  |
| O | -3.41694100 | -4.18068800 | 0.98284200  |
| O | -2.04376600 | -5.98078500 | 2.29209200  |
| C | -2.59426400 | -2.92198100 | -1.34023300 |
| O | -3.35936000 | -3.42833300 | -2.24119000 |
| N | -2.57673900 | -1.60024500 | -1.01968500 |
| C | -1.68970000 | -1.01009000 | 0.03197300  |
| H | -2.28791800 | -0.27583800 | 0.58416700  |
| H | -1.40104600 | -1.79334900 | 0.73868500  |
| C | 8.98027700  | -1.19216800 | -0.32575500 |
| C | 9.32743300  | -2.06891200 | -1.35543300 |
| C | 10.65212200 | -2.06939300 | -1.89165100 |
| C | 11.62653400 | -1.20053500 | -1.40432500 |
| C | 11.31150900 | -0.28045600 | -0.34394300 |
| N | 9.97901700  | -0.34168100 | 0.13229600  |
| H | 10.89792600 | -2.76058200 | -2.69220100 |
| H | 8.56552200  | -2.74040100 | -1.72789200 |
| H | 12.63681000 | -1.18519100 | -1.79728400 |
| O | 9.71345000  | 0.59386200  | 1.18299700  |
| O | 12.08209700 | 0.59553000  | 0.23037900  |
| C | 7.55677200  | -1.22122100 | 0.22244400  |
| O | 6.72881700  | -2.05631000 | -0.29719400 |
| N | 7.21316600  | -0.38230800 | 1.23533000  |
| H | 7.91074900  | 0.26302500  | 1.59307200  |
| C | 5.84932500  | -0.34965100 | 1.81481400  |
| H | 5.43364000  | -1.36218300 | 1.78299400  |
| H | 5.95226700  | -0.05033300 | 2.86370200  |
| C | 1.63804700  | 3.85807300  | 0.60895900  |
| C | 0.36275300  | 4.17906000  | 1.06665600  |
| C | -0.40426600 | 5.16281400  | 0.36294000  |
| C | 0.10084900  | 5.80574400  | -0.76772300 |
| C | 1.41791800  | 5.49430100  | -1.26146300 |
| N | 2.10977300  | 4.51829200  | -0.50653700 |
| H | -1.40002000 | 5.40972000  | 0.71996300  |
| H | -0.02811100 | 3.68347400  | 1.94685800  |
| H | -0.47210100 | 6.55059200  | -1.30879300 |
| O | 3.41678100  | 4.18097200  | -0.98244100 |
| O | 2.04343700  | 5.98134400  | -2.29111500 |
| C | 2.59452200  | 2.92200000  | 1.34070000  |
| O | 3.35974700  | 3.42820700  | 2.24162800  |
| N | 2.57691100  | 1.60030700  | 1.01998600  |
| C | 3.51289500  | 0.67569300  | 1.73186000  |
| H | 3.59854900  | 1.00570000  | 2.77205500  |
| H | 3.05973200  | -0.32059300 | 1.72411100  |
| C | -8.98046200 | 1.19204200  | 0.32487500  |
| C | -9.32785900 | 2.06911000  | 1.35419500  |

|   |              |             |             |
|---|--------------|-------------|-------------|
| C | -10.65262500 | 2.06963100  | 1.89022500  |
| C | -11.62686900 | 1.20049200  | 1.40306600  |
| C | -11.31159000 | 0.28005100  | 0.34307000  |
| N | -9.97903000  | 0.34125500  | -0.13299300 |
| H | -10.89862300 | 2.76107900  | 2.69049100  |
| H | -8.56608100  | 2.74082600  | 1.72651600  |
| H | -12.63720500 | 1.18518600  | 1.79587400  |
| O | -9.71314200  | -0.59467000 | -1.18326700 |
| O | -12.08201900 | -0.59620100 | -0.23105100 |
| C | -7.55689000  | 1.22109300  | -0.22315400 |
| O | -6.72905600  | 2.05632400  | 0.29644700  |
| N | -7.21309800  | 0.38203400  | -1.23585400 |
| H | -7.91058200  | -0.26342600 | -1.59355700 |
| C | -5.84918700  | 0.34938400  | -1.81517000 |
| H | -5.43357900  | 1.36195100  | -1.78346600 |
| H | -5.95198200  | 0.04988800  | -2.86402200 |
| C | 4.91343400   | 0.63772000  | 1.06485500  |
| H | 4.81693800   | 0.32733200  | 0.01643100  |
| H | 5.35724100   | 1.64104800  | 1.07929300  |
| C | 1.68973000   | 1.01031200  | -0.03163900 |
| H | 1.40104800   | 1.79366000  | -0.73824200 |
| H | 2.28786200   | 0.27609200  | -0.58396800 |
| C | 0.42466400   | 0.33364100  | 0.55761600  |
| H | -0.17451000  | 1.08947700  | 1.08428500  |
| H | 0.72067400   | -0.42275400 | 1.29820900  |
| C | -0.42461000  | -0.33343300 | -0.55724600 |
| H | 0.17457000   | -1.08928500 | -1.08388500 |
| H | -0.72059300  | 0.42295000  | -1.29786200 |
| C | -3.51268600  | -0.67575500 | -1.73176900 |
| H | -3.59819100  | -1.00588000 | -2.77193800 |
| H | -3.05958400  | 0.32055900  | -1.72407100 |
| C | -4.91331300  | -0.63780200 | -1.06494700 |
| H | -4.81698200  | -0.32726400 | -0.01655300 |
| H | -5.35703500  | -1.64117000 | -1.07930500 |
| H | -3.50561700  | -4.76919900 | 1.78868500  |
| H | -10.60355100 | -1.05408300 | -1.27769000 |
| H | 3.50530900   | 4.76961600  | -1.78820500 |
| H | 10.60397200  | 1.05308500  | 1.27741800  |

3,3,3-(LI-1,2-HOPO)H<sub>4</sub>, CPCM

|   |             |             |             |
|---|-------------|-------------|-------------|
| C | -0.96116800 | -3.59363300 | -1.48149300 |
| C | 0.19362600  | -3.80111100 | -2.23137200 |
| C | 1.16164800  | -4.75251600 | -1.77336500 |
| C | 0.96877000  | -5.47578000 | -0.59589200 |
| C | -0.21745500 | -5.28177000 | 0.19831300  |
| N | -1.12149300 | -4.32811100 | -0.32482200 |
| H | 2.06307700  | -4.91139900 | -2.35825900 |
| H | 0.34113600  | -3.24588300 | -3.14945900 |
| H | 1.69504600  | -6.19830900 | -0.24054200 |
| O | -2.30129400 | -4.10445800 | 0.45372600  |
| O | -0.56015300 | -5.85559000 | 1.31268600  |
| C | -2.12518300 | -2.71426700 | -1.92638600 |
| O | -3.06190900 | -3.26259800 | -2.61518000 |
| N | -2.11072900 | -1.39629200 | -1.58810200 |
| C | -1.02768400 | -0.75441800 | -0.78040000 |
| H | -1.51149400 | -0.05976700 | -0.08376700 |
| H | -0.52397700 | -1.51820300 | -0.18118400 |
| C | 8.06955500  | -0.85444400 | 1.51869600  |
| C | 8.13559200  | -1.61203600 | 2.68971400  |
| C | 9.25064000  | -1.48503600 | 3.57438900  |
| C | 10.29478200 | -0.60586800 | 3.29452400  |
| C | 10.26805800 | 0.19279600  | 2.09778700  |
| N | 9.13068900  | 0.00810700  | 1.27330300  |
| H | 9.27851600  | -2.08511500 | 4.47891800  |
| H | 7.31982700  | -2.29013600 | 2.90142900  |
| H | 11.14909400 | -0.49355300 | 3.95250000  |
| O | 9.15189500  | 0.81752400  | 0.09310800  |
| O | 11.14486000 | 1.05480500  | 1.67523900  |
| C | 6.85984900  | -1.01481500 | 0.60341000  |
| O | 5.97108600  | -1.88512900 | 0.92849600  |
| N | 6.75638200  | -0.24367100 | -0.51144500 |
| H | 7.48823000  | 0.43207700  | -0.70909900 |
| C | 5.59731600  | -0.32613000 | -1.43215700 |
| H | 5.95718400  | -0.04131900 | -2.42704200 |
| H | 5.25661300  | -1.36595200 | -1.47242400 |
| C | 0.96157000  | 3.59393100  | -1.48196200 |
| C | -0.19334300 | 3.80136900  | -2.23167500 |
| C | -1.16123900 | 4.75287800  | -1.77362600 |
| C | -0.96811200 | 5.47631400  | -0.59629300 |
| C | 0.21829900  | 5.28244600  | 0.19765300  |
| N | 1.12216400  | 4.32861400  | -0.32546900 |
| H | -2.06279600 | 4.91167400  | -2.35834400 |
| H | -0.34104700 | 3.24599100  | -3.14964100 |
| H | -1.69432200 | 6.19887900  | -0.24088400 |
| O | 2.30216300  | 4.10516400  | 0.45282800  |
| O | 0.56118600  | 5.85629800  | 1.31195900  |
| C | 2.12545300  | 2.71444100  | -1.92694800 |
| O | 3.06211200  | 3.26262200  | -2.61595200 |
| N | 2.11098500  | 1.39654400  | -1.58837300 |
| C | 3.25995900  | 0.53511700  | -2.00839400 |
| H | 2.88830800  | -0.49093600 | -2.09361000 |
| H | 3.59312300  | 0.86292500  | -2.99802200 |
| C | -8.07017200 | 0.85394000  | 1.51797700  |
| C | -8.13654900 | 1.61146400  | 2.68901600  |



|   |              |             |             |
|---|--------------|-------------|-------------|
| C | -9.25182300  | 1.48435900  | 3.57339600  |
| C | -10.29585700 | 0.60516800  | 3.29319800  |
| C | -10.26879800 | -0.19341700 | 2.09640800  |
| N | -9.13120200  | -0.00865500 | 1.27225800  |
| H | -9.27995800  | 2.08438000  | 4.47795500  |
| H | -7.32088000  | 2.28960200  | 2.90097900  |
| H | -11.15033300 | 0.49276300  | 3.95094500  |
| O | -9.15203600  | -0.81798100 | 0.09199400  |
| O | -11.14542000 | -1.05549200 | 1.67364000  |
| C | -6.86027300  | 1.01448700  | 0.60298600  |
| O | -5.97162300  | 1.88479800  | 0.92838300  |
| N | -6.75649200  | 0.24344500  | -0.51191200 |
| H | -7.48820200  | -0.43240600 | -0.70973200 |
| C | -5.59723700  | 0.32610500  | -1.43236600 |
| H | -5.25666300  | 1.36597300  | -1.47248100 |
| H | -5.95685100  | 0.04132700  | -2.42735200 |
| C | 4.43295100   | 0.60430800  | -0.99434600 |
| H | 4.80021100   | 1.63578800  | -0.92451000 |
| H | 4.07923300   | 0.30518300  | 0.00079600  |
| C | 1.02790400   | 0.75491400  | -0.78052700 |
| H | 1.51161900   | 0.06030700  | -0.08378500 |
| H | 0.52430800   | 1.51887000  | -0.18143700 |
| C | 0.00003900   | 0.00026800  | -1.66463700 |
| H | 0.51704400   | -0.71891900 | -2.31139600 |
| H | -0.51706000  | 0.71950700  | -2.31126400 |
| C | -3.25974900  | -0.53501400 | -2.00829600 |
| H | -3.59278500  | -0.86293700 | -2.99793100 |
| H | -2.88817900  | 0.49106300  | -2.09356300 |
| C | -4.43284600  | -0.60421500 | -0.99437100 |
| H | -4.07924800  | -0.30498900 | 0.00078300  |
| H | -4.80004500  | -1.63571500 | -0.92450500 |
| H | -10.01636300 | -1.32102800 | 0.20226300  |
| H | -2.17056100  | -4.73735900 | 1.21894200  |
| H | 2.17175900   | 4.73849400  | 1.21775400  |
| H | 10.01622300  | 1.32051800  | 0.20372300  |

DFOH<sub>2</sub>, CPCM

|   |             |             |             |
|---|-------------|-------------|-------------|
| N | -2.21171500 | 1.03373600  | 1.95342200  |
| C | -2.32889200 | 2.54685100  | 1.85768100  |
| C | -0.95665800 | 3.24086700  | 1.66407600  |
| C | -1.07442800 | 4.55132200  | 0.82508200  |
| C | -0.89500300 | 4.39421900  | -0.71563500 |
| C | -2.00182200 | 3.67462900  | -1.53369800 |
| N | -1.97851300 | 2.18104800  | -1.44946300 |
| C | -3.05025200 | 1.32872600  | -1.63267800 |
| C | -4.46600700 | 1.89064400  | -1.41253700 |
| C | -5.52624200 | 0.76923400  | -1.31415900 |
| C | -5.29597200 | -0.21255200 | -0.15128000 |
| O | -4.76358500 | 0.16833200  | 0.96028800  |
| N | -5.73330100 | -1.48766100 | -0.35233700 |
| C | -5.72239500 | -2.59117100 | 0.64703500  |
| C | -4.56871000 | -3.61015400 | 0.41810400  |
| C | -3.20274000 | -3.10285700 | 0.95056300  |
| C | -1.99366400 | -3.95202800 | 0.47648200  |
| C | -0.63746300 | -3.52346300 | 1.10963600  |
| N | -0.45251900 | -2.03591200 | 1.13880100  |
| C | -0.15539600 | -1.26454600 | 0.08238300  |
| C | 0.24806000  | -1.86656000 | -1.26472400 |
| C | 1.60581200  | -1.31338300 | -1.80482900 |
| C | 2.81716200  | -1.80799600 | -1.01227900 |
| O | 2.89392400  | -1.61978200 | 0.26699100  |
| N | 3.79741100  | -2.44911000 | -1.69852700 |
| C | 5.06199700  | -2.95686400 | -1.10160200 |
| C | 6.28366800  | -2.04636600 | -1.41475100 |
| C | 6.19538500  | -0.61196700 | -0.82295200 |
| C | 6.31736900  | -0.56146300 | 0.72386500  |
| C | 5.95704100  | 0.81994400  | 1.32916100  |
| N | 4.52330800  | 1.17067700  | 1.12755900  |
| C | 3.98162000  | 2.28895200  | 0.53696600  |
| C | 4.94963600  | 3.26339700  | -0.13953600 |
| O | -0.68007900 | 1.63111300  | -1.78272500 |
| O | -2.87492800 | 0.08980100  | -1.92028200 |
| O | -0.78274900 | -1.44345400 | 2.38425800  |
| O | -0.22235800 | 0.06229100  | 0.18564000  |
| O | 3.62279800  | 0.32022500  | 1.87080300  |
| O | 2.71571800  | 2.50843000  | 0.53422700  |
| H | -1.48075700 | 0.65255600  | 1.30306600  |
| H | -1.93632900 | 0.71658500  | 2.88497900  |
| H | -3.12044300 | 0.60128300  | 1.70638000  |
| H | -2.83524200 | 2.89812000  | 2.76185000  |
| H | -2.98341600 | 2.74593100  | 1.01121600  |
| H | -0.52491000 | 3.46849400  | 2.64805200  |
| H | -0.25890200 | 2.55545600  | 1.16623200  |
| H | -0.29201500 | 5.24765900  | 1.16042100  |
| H | -2.03604000 | 5.04601800  | 1.03838800  |
| H | 0.06856500  | 3.91074100  | -0.92173800 |
| H | -0.83310700 | 5.40597300  | -1.14435200 |
| H | -1.88051600 | 3.94305400  | -2.59395400 |
| H | -2.99388400 | 4.00905000  | -1.21676500 |
| H | -4.49540400 | 2.51381600  | -0.51344200 |
| H | -4.72503100 | 2.54452500  | -2.25657500 |

|   |             |             |             |
|---|-------------|-------------|-------------|
| H | -5.58560900 | 0.21525900  | -2.25651700 |
| H | -6.50630400 | 1.24168400  | -1.15496500 |
| H | -6.12125400 | -1.71209700 | -1.26273100 |
| H | -5.65003400 | -2.14498800 | 1.64425800  |
| H | -6.69109700 | -3.09932600 | 0.56940800  |
| H | -4.83701300 | -4.55134000 | 0.92169300  |
| H | -4.50333000 | -3.83381800 | -0.65818800 |
| H | -3.23634500 | -3.08051100 | 2.05029600  |
| H | -3.05189200 | -2.06657700 | 0.62215100  |
| H | -2.15046900 | -5.01325200 | 0.72527800  |
| H | -1.92379700 | -3.89086700 | -0.61990900 |
| H | 0.19995500  | -4.00160500 | 0.58915400  |
| H | -0.59311100 | -3.81727300 | 2.16143400  |
| H | 0.28339600  | -2.95752500 | -1.23028600 |
| H | -0.52612000 | -1.58854500 | -1.99148000 |
| H | 1.60167000  | -0.21793100 | -1.75118700 |
| H | 1.70432800  | -1.59370900 | -2.85872700 |
| H | 3.67469500  | -2.57384000 | -2.69806800 |
| H | 4.90264900  | -3.05249300 | -0.02457200 |
| H | 5.23854100  | -3.95901300 | -1.50963000 |
| H | 7.18118100  | -2.55562000 | -1.03036400 |
| H | 6.39939400  | -1.98245200 | -2.50717800 |
| H | 5.24669400  | -0.15037200 | -1.13393100 |
| H | 6.99595400  | 0.00155500  | -1.26391000 |
| H | 5.67780200  | -1.32258000 | 1.18885500  |
| H | 7.35031000  | -0.79236700 | 1.02415500  |
| H | 6.56250800  | 1.60979500  | 0.87799800  |
| H | 6.14665100  | 0.82141200  | 2.41080400  |
| H | 5.62529500  | 3.72184800  | 0.59221000  |
| H | 5.55821200  | 2.76579000  | -0.90212500 |
| H | 4.35499000  | 4.04759800  | -0.61266500 |
| H | -0.44614300 | 0.97108300  | -1.01107800 |
| H | 3.31045700  | -0.40675900 | 1.23404200  |

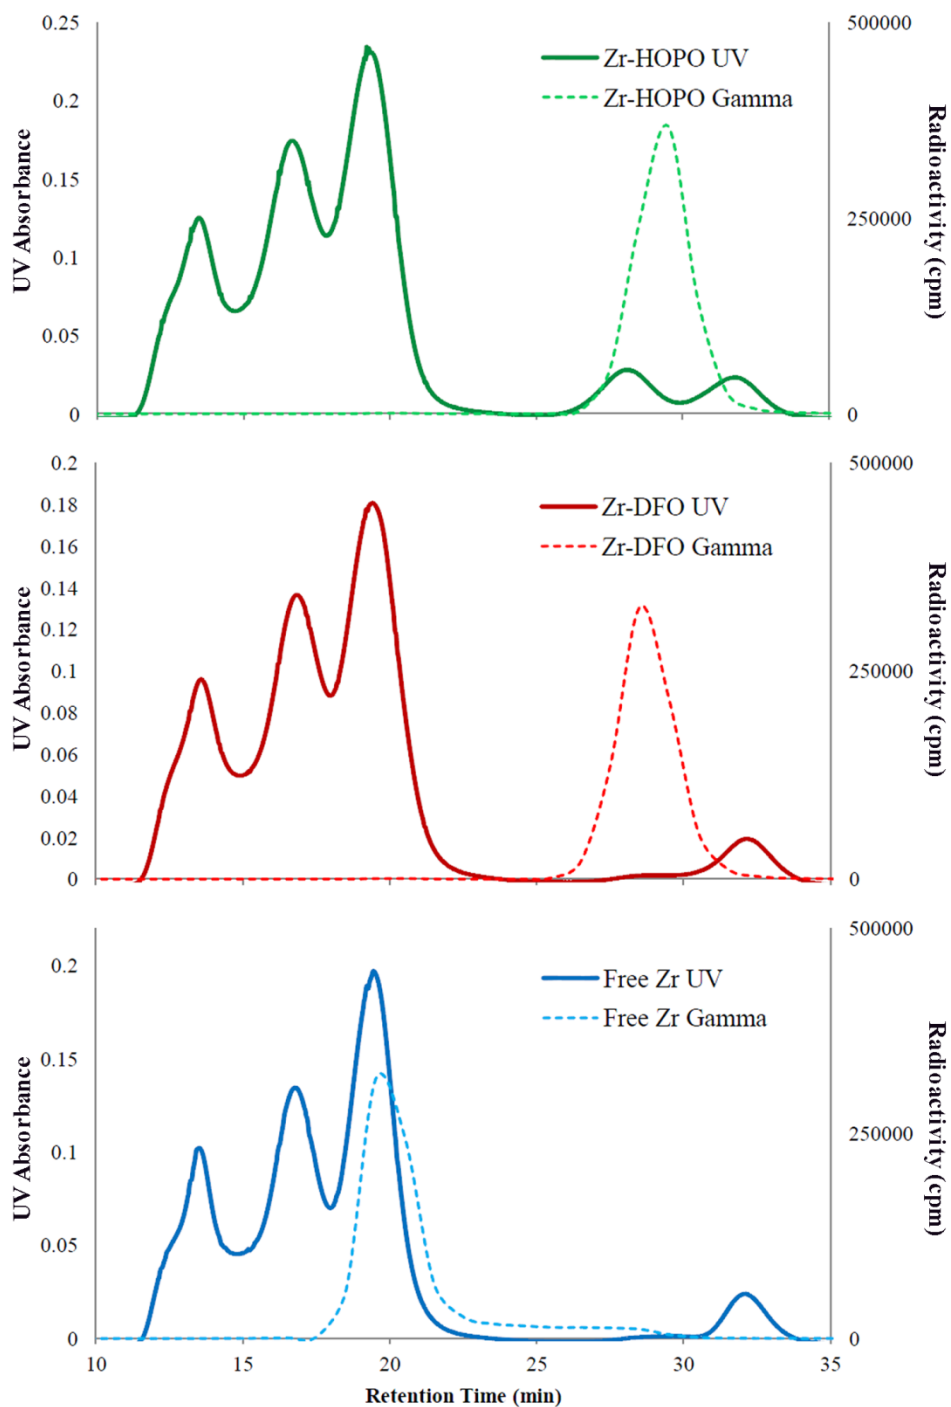

Figure S12. SEC chromatograms of  $^{89}\text{Zr}$ -HOPO,  $^{89}\text{Zr}$ -DFO, and free  $^{89}\text{Zr}$  in serum after 7 days. Solid lines are the UV absorbance due to the serum components and to the HOPO ligand itself. Dotted lines are the radiotracer associated with the  $^{89}\text{Zr}$ .

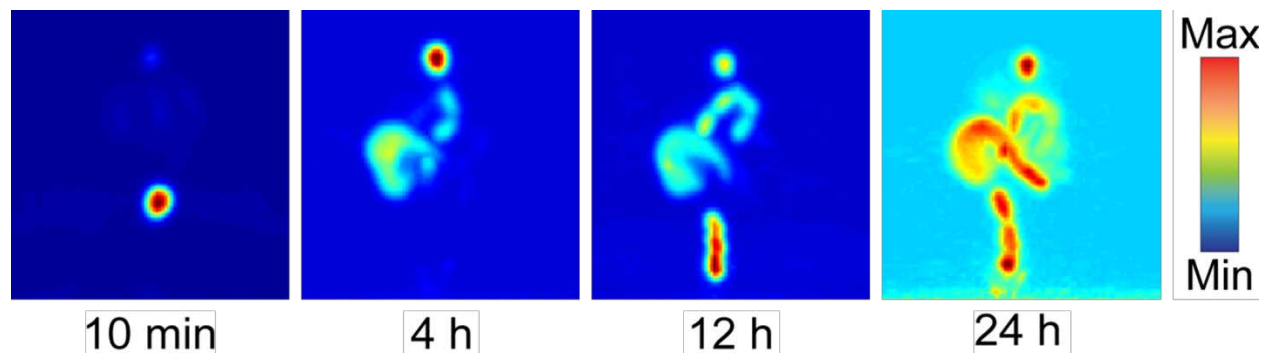

Figure S13. Maximum intensity projection PET images

|                 | 10 min      |              | 1 h         |             | 4 h         |             | 12 h        |             | 24 h        |             |
|-----------------|-------------|--------------|-------------|-------------|-------------|-------------|-------------|-------------|-------------|-------------|
|                 | Zr-HOPO     | Zr-DFO       | Zr-HOPO     | Zr-DFO      | Zr-HOPO     | Zr-DFO      | Zr-HOPO     | Zr-DFO      | Zr-HOPO     | Zr-DFO      |
| Blood           | 3.24 ± 0.66 | 5.11 ± 0.90  | 0.17 ± 0.10 | 0.10 ± 0.04 | 0.05 ± 0.04 | 0.03 ± 0.01 | 0.02 ± 0.00 | 0.01 ± 0.00 | 0.02 ± 0.00 | 0.02 ± 0.02 |
| Heart           | 1.57 ± 0.22 | 2.17 ± 0.62  | 0.12 ± 0.06 | 0.06 ± 0.02 | 0.06 ± 0.01 | 0.03 ± 0.01 | 0.06 ± 0.01 | 0.02 ± 0.00 | 0.07 ± 0.01 | 0.02 ± 0.01 |
| Lung            | 1.07 ± 0.17 | 2.16 ± 1.08  | 0.17 ± 0.09 | 0.14 ± 0.04 | 0.08 ± 0.01 | 0.04 ± 0.02 | 0.06 ± 0.01 | 0.02 ± 0.01 | 0.09 ± 0.05 | 0.04 ± 0.01 |
| Gall Bladder    | 6.61 ± 2.87 | 1.57 ± 0.25  | 6.94 ± 3.38 | 0.47 ± 0.14 | 1.00 ± 0.41 | 0.26 ± 0.15 | 2.45 ± 1.02 | 0.16 ± 0.14 | 1.15 ± 0.59 | 0.23 ± 0.21 |
| Liver           | 3.29 ± 0.75 | 0.88 ± 0.49  | 0.22 ± 0.09 | 0.24 ± 0.07 | 0.13 ± 0.01 | 0.12 ± 0.03 | 0.09 ± 0.02 | 0.06 ± 0.02 | 0.06 ± 0.03 | 0.11 ± 0.02 |
| Spleen          | 0.31 ± 0.04 | 0.37 ± 0.22  | 0.09 ± 0.03 | 0.06 ± 0.02 | 0.06 ± 0.01 | 0.03 ± 0.01 | 0.05 ± 0.01 | 0.02 ± 0.01 | 0.06 ± 0.01 | 0.02 ± 0.01 |
| Stomach         | 1.22 ± 0.39 | 0.62 ± 0.28  | 0.30 ± 0.15 | 1.10 ± 0.51 | 0.50 ± 0.74 | 0.06 ± 0.02 | 0.01 ± 0.00 | 0.01 ± 0.00 | 0.02 ± 0.00 | 0.01 ± 0.01 |
| Large Intestine | 0.26 ± 0.15 | 0.43 ± 0.13  | 0.09 ± 0.06 | 0.02 ± 0.01 | 7.17 ± 2.15 | 0.62 ± 0.55 | 0.10 ± 0.03 | 0.07 ± 0.05 | 0.03 ± 0.02 | 0.02 ± 0.01 |
| Small Intestine | 5.99 ± 1.18 | 0.94 ± 0.16  | 1.11 ± 0.35 | 0.35 ± 0.17 | 0.12 ± 0.13 | 0.04 ± 0.02 | 0.02 ± 0.01 | 0.01 ± 0.01 | 0.02 ± 0.00 | 0.02 ± 0.01 |
| Kidney          | 9.46 ± 2.71 | 14.44 ± 5.88 | 1.05 ± 0.51 | 1.39 ± 0.55 | 0.40 ± 0.14 | 1.10 ± 0.44 | 0.53 ± 0.23 | 0.36 ± 0.13 | 0.51 ± 0.29 | 1.12 ± 0.33 |
| Bladder         | 2.04 ± 1.06 | 2.50 ± 0.48  | 0.73 ± 0.36 | 2.47 ± 1.30 | 0.58 ± 0.27 | 1.22 ± 0.77 | 0.54 ± 0.26 | 0.69 ± 0.31 | 0.28 ± 0.14 | 0.56 ± 0.41 |
| Muscle          | 0.36 ± 0.06 | 0.73 ± 0.56  | 0.10 ± 0.03 | 0.02 ± 0.01 | 0.09 ± 0.06 | 0.01 ± 0.01 | 0.06 ± 0.01 | 0.01 ± 0.00 | 0.06 ± 0.01 | 0.01 ± 0.00 |
| Bone            | 1.04 ± 0.44 | 0.43 ± 0.10  | 0.29 ± 0.09 | 0.07 ± 0.04 | 0.23 ± 0.12 | 0.04 ± 0.02 | 0.25 ± 0.07 | 0.03 ± 0.01 | 0.17 ± 0.03 | 0.06 ± 0.01 |
| Tail            | 4.25 ± 1.46 | 5.13 ± 2.92  | 0.81 ± 0.34 | 0.26 ± 0.05 | 0.29 ± 0.18 | 0.14 ± 0.08 | 0.11 ± 0.04 | 0.13 ± 0.05 | 0.05 ± 0.01 | 0.08 ± 0.02 |

Table S2. Full biodistribution data including all tissues collected. All values expressed as %ID/g.

|                 | 10 min      |             | 1 h         |             | 4 h         |             | 12 h        |             | 24 h        |             |
|-----------------|-------------|-------------|-------------|-------------|-------------|-------------|-------------|-------------|-------------|-------------|
|                 | Zr-HOPO     | Zr-DFO      |
| Blood           | 1.28 ± 0.39 | 2.71 ± 0.94 | 0.08 ± 0.03 | 0.04 ± 0.01 | 0.03 ± 0.01 | 0.01 ± 0.01 | 0.01 ± 0.00 | 0.01 ± 0.00 | 0.01 ± 0.00 | 0.01 ± 0.01 |
| Heart           | 0.27 ± 0.02 | 0.33 ± 0.10 | 0.02 ± 0.01 | 0.01 ± 0.00 | 0.01 ± 0.00 | 0.00 ± 0.00 | 0.01 ± 0.00 | 0.00 ± 0.00 | 0.01 ± 0.00 | 0.00 ± 0.00 |
| Lung            | 0.13 ± 0.04 | 0.30 ± 0.21 | 0.03 ± 0.01 | 0.02 ± 0.00 | 0.01 ± 0.00 | 0.01 ± 0.00 | 0.01 ± 0.00 | 0.00 ± 0.00 | 0.01 ± 0.00 | 0.01 ± 0.00 |
| Gall Bladder    | 0.34 ± 0.29 | 0.13 ± 0.09 | 0.10 ± 0.16 | 0.00 ± 0.00 | 0.01 ± 0.00 | 0.00 ± 0.00 | 0.01 ± 0.00 | 0.00 ± 0.00 | 0.01 ± 0.00 | 0.00 ± 0.00 |
| Liver           | 1.20 ± 0.09 | 0.31 ± 0.10 | 0.10 ± 0.01 | 0.12 ± 0.02 | 0.04 ± 0.01 | 0.05 ± 0.02 | 0.04 ± 0.01 | 0.02 ± 0.01 | 0.02 ± 0.01 | 0.05 ± 0.02 |
| Spleen          | 0.04 ± 0.01 | 0.07 ± 0.02 | 0.01 ± 0.00 | 0.01 ± 0.00 | 0.01 ± 0.00 | 0.00 ± 0.00 | 0.01 ± 0.00 | 0.00 ± 0.00 | 0.01 ± 0.00 | 0.00 ± 0.00 |
| Stomach         | 0.67 ± 0.68 | 0.22 ± 0.10 | 0.16 ± 0.08 | 0.66 ± 0.26 | 0.45 ± 0.50 | 0.02 ± 0.01 | 0.01 ± 0.00 | 0.01 ± 0.00 | 0.01 ± 0.00 | 0.01 ± 0.00 |
| Large Intestine | 0.23 ± 0.11 | 0.41 ± 0.13 | 1.05 ± 1.93 | 0.02 ± 0.00 | 6.53 ± 1.86 | 1.37 ± 1.58 | 0.11 ± 0.02 | 0.07 ± 0.04 | 0.04 ± 0.01 | 0.02 ± 0.01 |
| Small Intestine | 2.18 ± 1.25 | 0.43 ± 0.13 | 0.77 ± 0.33 | 0.19 ± 0.13 | 0.35 ± 0.62 | 0.02 ± 0.01 | 0.01 ± 0.00 | 0.01 ± 0.00 | 0.01 ± 0.00 | 0.01 ± 0.00 |
| Kidney          | 2.78 ± 1.57 | 6.11 ± 2.87 | 0.40 ± 0.20 | 0.57 ± 0.18 | 0.16 ± 0.07 | 0.44 ± 0.17 | 0.21 ± 0.10 | 0.14 ± 0.05 | 0.21 ± 0.12 | 0.46 ± 0.16 |
| Bladder         | 0.08 ± 0.09 | 0.07 ± 0.04 | 0.01 ± 0.01 | 0.05 ± 0.03 | 0.01 ± 0.00 | 0.02 ± 0.01 | 0.01 ± 0.00 | 0.01 ± 0.01 | 0.01 ± 0.00 | 0.01 ± 0.01 |
| Muscle          | 0.04 ± 0.01 | 0.10 ± 0.10 | 0.01 ± 0.00 | 0.00 ± 0.00 | 0.01 ± 0.00 | 0.00 ± 0.00 | 0.01 ± 0.00 | 0.00 ± 0.00 | 0.01 ± 0.00 | 0.00 ± 0.00 |
| Bone            | 0.05 ± 0.04 | 0.02 ± 0.00 | 0.01 ± 0.00 | 0.00 ± 0.00 | 0.01 ± 0.00 | 0.00 ± 0.00 | 0.01 ± 0.00 | 0.00 ± 0.00 | 0.01 ± 0.00 | 0.00 ± 0.00 |
| Tail            | 2.55 ± 0.95 | 1.74 ± 0.72 | 0.27 ± 0.05 | 0.12 ± 0.03 | 0.14 ± 0.07 | 0.07 ± 0.03 | 0.05 ± 0.01 | 0.07 ± 0.03 | 0.03 ± 0.01 | 0.04 ± 0.01 |

Table S3. Biodistribution data without normalization. All values expressed as %ID.

### Biodistribution of $^{89}\text{Zr}$ -HOPO and $^{89}\text{Zr}$ -DFO in Healthy Female Athymic Nude Mice

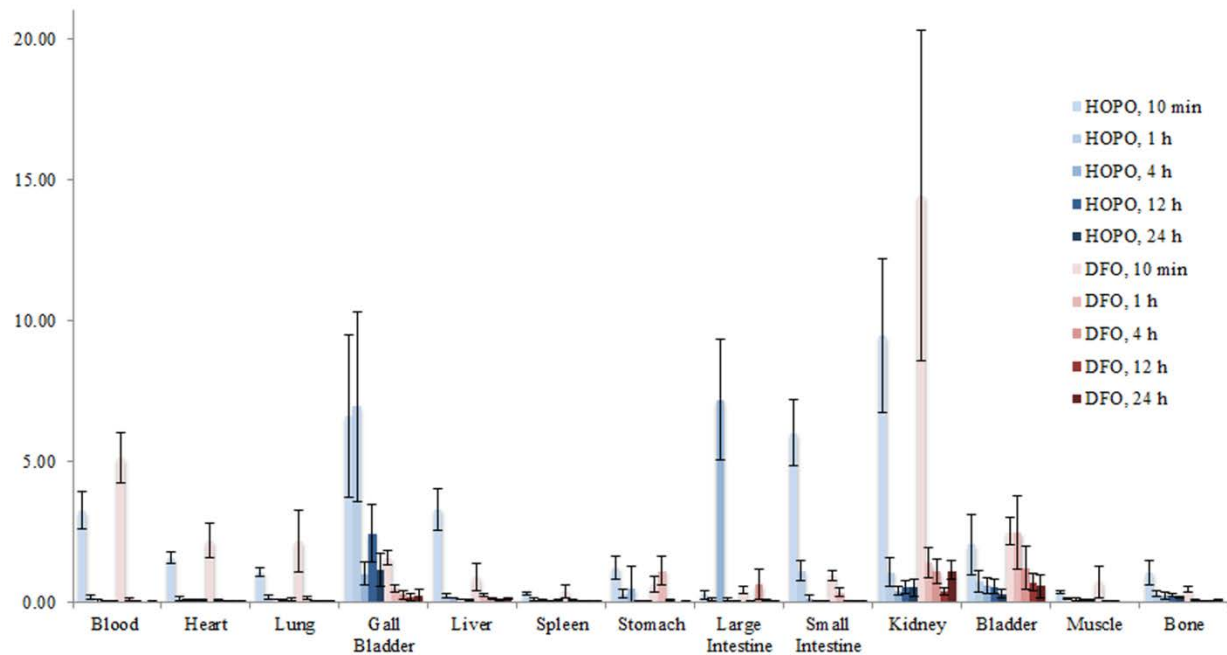

Figure S14. Graphical biodistribution data.



**Biodistribution of  $^{89}\text{Zr}$ -HOPO and  $^{89}\text{Zr}$ -DFO in Healthy Female Athymic Nude Mice - Zoom**

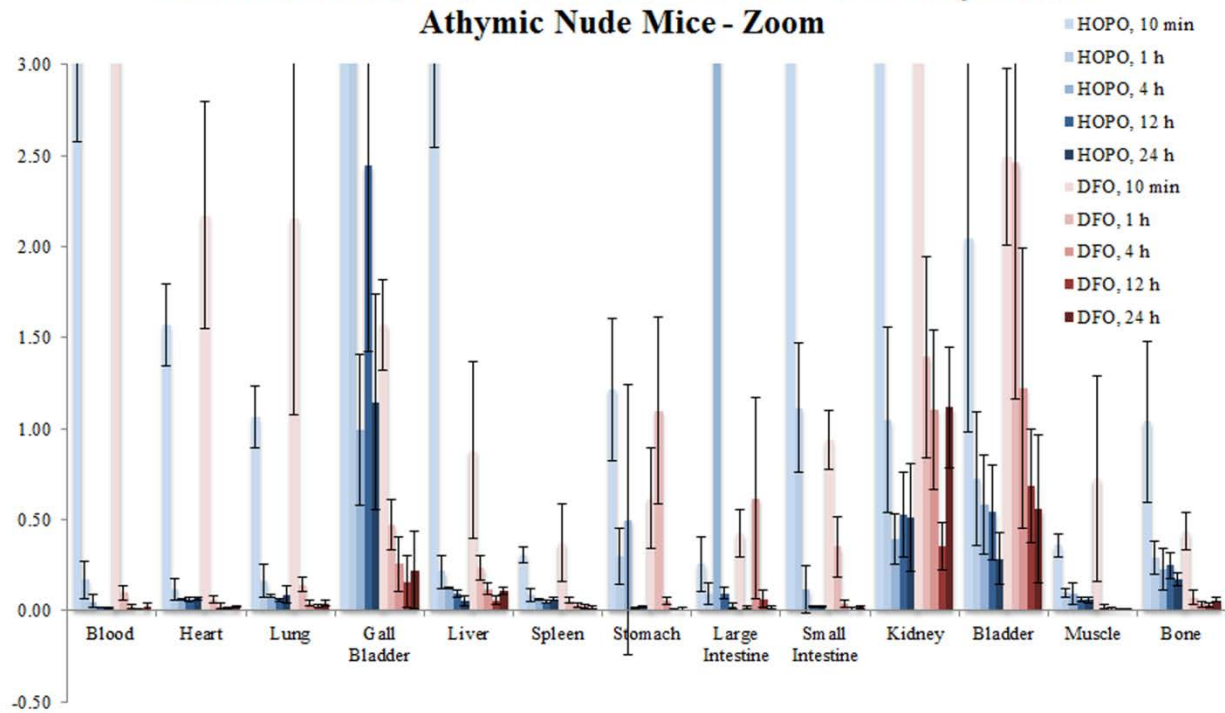

Figure S15. Zoomed in biodistribution data.

|                 | 10 min         | 1 h            | 4 h            | 12 h           | 24 h           |
|-----------------|----------------|----------------|----------------|----------------|----------------|
| Blood           | <b>0.01529</b> | 0.25713        | 0.27915        | n/a            | 0.35592        |
| Heart           | 0.11823        | 0.16419        | <b>0.00164</b> | <b>0.00013</b> | <b>0.00011</b> |
| Lung            | 0.09260        | 0.63237        | <b>0.00928</b> | <b>0.00042</b> | 0.14603        |
| Gall Bladder    | <b>0.01283</b> | <b>0.01075</b> | <b>0.01512</b> | <b>0.00447</b> | <b>0.02669</b> |
| Liver           | <b>0.00169</b> | 0.70805        | 0.63334        | 0.08529        | <b>0.02658</b> |
| Spleen          | 0.57396        | 0.19204        | <b>0.00677</b> | <b>0.00144</b> | <b>0.00015</b> |
| Stomach         | 0.14010        | <b>0.02319</b> | 0.18904        | 0.13398        | 0.20703        |
| Large Intestine | 0.12945        | <b>0.04036</b> | <b>0.00384</b> | 0.37090        | 0.34642        |
| Small Intestine | <b>0.03807</b> | <b>0.00781</b> | 0.30326        | 0.11353        | 1.00000        |
| Kidney          | 0.11012        | 0.39845        | <b>0.02181</b> | 0.24716        | <b>0.03458</b> |
| Bladder         | 0.46929        | <b>0.04248</b> | 0.17054        | 0.49863        | 0.24675        |
| Muscle          | 0.24602        | <b>0.00310</b> | <b>0.03876</b> | <b>0.00003</b> | <b>0.00036</b> |
| Bone            | <b>0.03801</b> | <b>0.00481</b> | <b>0.01486</b> | <b>0.00090</b> | <b>0.00088</b> |
| Tail            | 0.60666        | <b>0.02000</b> | 0.15382        | 0.47791        | 0.03349        |

Table S4. Calculated P values for the comparison of <sup>89</sup>Zr-HOPO and <sup>89</sup>Zr-DFO biodistribution data. Multiple unpaired t tests were carried out using GraphPad Prism. Significant values are shown in bold (P < 0.05).
